# Supplementary material for: Synthesis and biological evaluation of hybrids from farnesylthiosalicylic acid and hydroxylcinnamic acid with dual inhibitory activities of Ras-related signaling and phosphorylated NF-κB
Source: Royal Society of Chemistry journal article supplement (doi:10.1039/c4ob00023d), 2014-01-01
Supplement: c4ob00023d1.pdf [file c4ob00023d1.pdf]

Supporting Information

**Synthesis and biological evaluation of hybrids from farnesylthiosalicylic acid and hydroxycinnamic acid with dual inhibitory activities of Ras-related signaling and phosphorylated NF- $\kappa$ B**

Yong Ling,<sup>a,b</sup> Zhiqiang Wang,<sup>a,b</sup> Xuemin Wang,<sup>a</sup> Ying Zhao,<sup>a</sup> Wei Zhang,<sup>a</sup> Xinyang Wang,<sup>a</sup> Li Chen,<sup>b,c</sup> Zhangjian Huang<sup>b,c,\*</sup> and Yihua Zhang<sup>b,c,\*</sup>

<sup>a</sup> School of Pharmacy, Nantong University, Nantong, 226001, PR China.

<sup>b</sup> State Key Laboratory of Natural Medicines, China Pharmaceutical University, Nanjing, 210009, PR China.

<sup>c</sup> Center of Drug Discovery, China Pharmaceutical University, Nanjing, 210009, PR China.

**Table of contents:**

|                                                                                |     |
|--------------------------------------------------------------------------------|-----|
| The number of experiments and the related SD values for Figure 1 legend        | S2  |
| Table of <b>5f</b> purity by HPLC                                              | S2  |
| The <sup>1</sup> H NMR spectra for <b>5a-5r</b> , <b>6a-6b</b> , <b>7b-7c</b>  | S3  |
| The <sup>13</sup> C NMR spectra for <b>5a-5r</b> , <b>6a-6b</b> , <b>7b-7c</b> | S14 |
| The HRMS spectra for <b>5a-5r</b> , <b>7b-7c</b>                               | S25 |

Table 1. The number of experiments and the related SD values for Figure 1 legend in the manuscript.

| Compound  | <i>In vitro</i> inhibitory activity (%) |              |              |
|-----------|-----------------------------------------|--------------|--------------|
|           | Mcf-7                                   | SMMC-7721    | SGC-7901     |
| FTS       | 55.16 ± 3.23                            | 45.79 ± 4.95 | 57.04 ± 4.66 |
| Sorafenib | 90.35 ± 4.53                            | 92.78 ± 5.28 | 93.03 ± 6.83 |
| <b>5a</b> | 91.32 ± 6.06                            | 93.01 ± 5.21 | 94.64 ± 4.97 |
| <b>5b</b> | 35.70 ± 3.28                            | 43.08 ± 2.68 | 32.69 ± 3.55 |
| <b>5c</b> | 93.52 ± 4.93                            | 87.98 ± 6.56 | 94.96 ± 4.67 |
| <b>5d</b> | 38.39 ± 4.16                            | 39.02 ± 3.16 | 36.49 ± 4.04 |
| <b>5e</b> | 92.46 ± 5.47                            | 89.11 ± 6.10 | 87.56 ± 5.09 |
| <b>5f</b> | 91.54 ± 6.85                            | 97.43 ± 4.18 | 96.21 ± 6.87 |
| <b>5g</b> | 88.65 ± 5.92                            | 87.72 ± 6.18 | 91.58 ± 5.65 |
| <b>5h</b> | 12.56 ± 2.61                            | 11.53 ± 2.12 | 8.56 ± 1.35  |
| <b>5i</b> | 62.76 ± 4.86                            | 64.46 ± 4.62 | 60.96 ± 4.16 |
| <b>5j</b> | 28.09 ± 2.42                            | 36.55 ± 2.78 | 21.66 ± 3.54 |
| <b>5k</b> | 72.03 ± 5.23                            | 78.07 ± 5.64 | 79.58 ± 5.74 |
| <b>5l</b> | 11.43 ± 1.86                            | 7.42 ± 1.41  | 8.81 ± 1.73  |
| <b>5m</b> | 70.21 ± 4.68                            | 75.37 ± 3.85 | 63.04 ± 4.98 |
| <b>5n</b> | 86.83 ± 4.29                            | 87.68 ± 5.92 | 84.98 ± 5.15 |
| <b>5o</b> | 61.99 ± 4.52                            | 62.95 ± 3.66 | 51.59 ± 3.51 |
| <b>5p</b> | 14.86 ± 2.67                            | 23.40 ± 1.35 | 13.66 ± 1.69 |
| <b>5q</b> | 61.98 ± 4.32                            | 67.21 ± 4.06 | 55.09 ± 3.93 |
| <b>5r</b> | 49.64 ± 2.65                            | 44.48 ± 3.02 | 42.98 ± 2.06 |

#### HPLC assessment of compound **5f** purity.

Compounds (**5f**) with a purity of 99.1% (HPLC analysis) were used for subsequent experiments. We provided the spectra of HPLC assays as below: Column: Shimadzu C18 (150mm×4.6mm×5μm); Mobile phase: Methanol: aqueous solution of triethylamine (28.5 mmol/L) = 65: 35; Wavelength: 254 nm; Rate: 1 mL/min; Temperature: 30 °C; Pressure: 85-142 kgf.

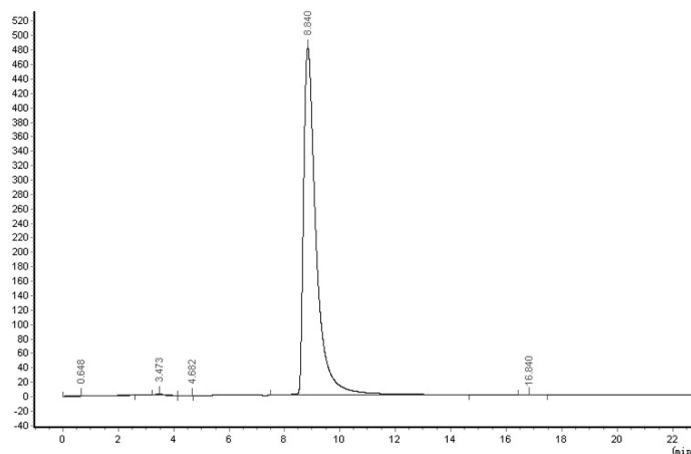

Fig. 1. HPLC spectrum of **5f**

The  $^1\text{H}$  NMR spectra for **5a-5r**

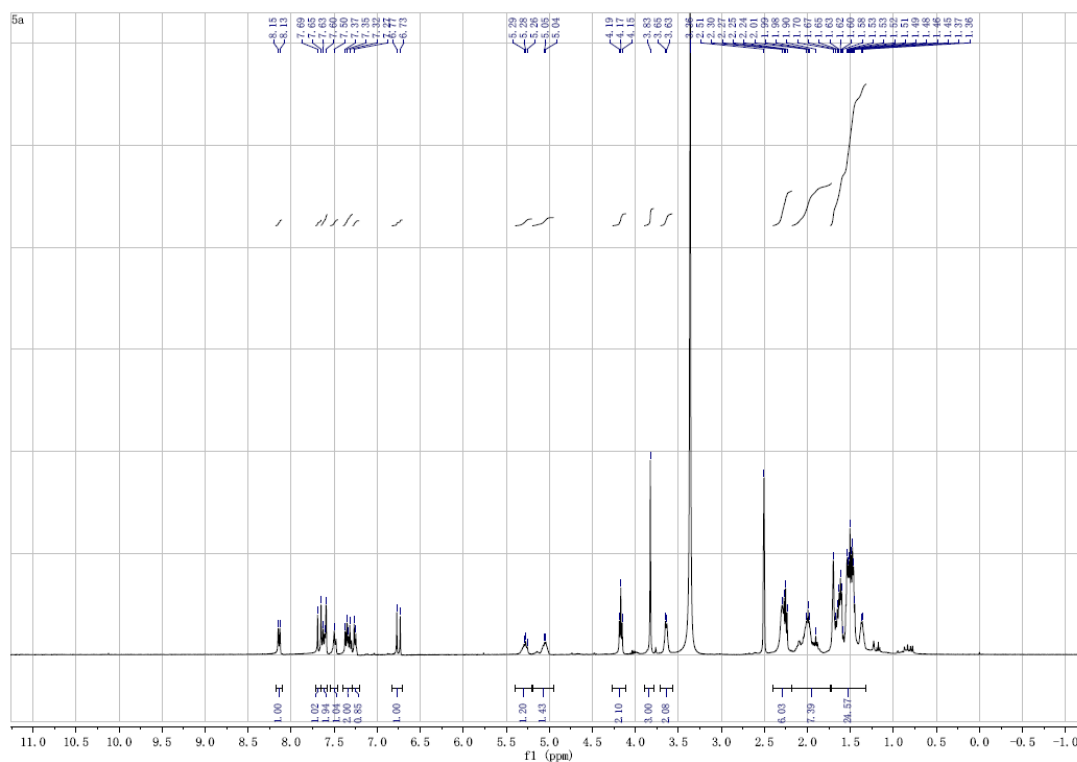

Fig. 2. The  $^1\text{H}$  NMR spectra of **5a**

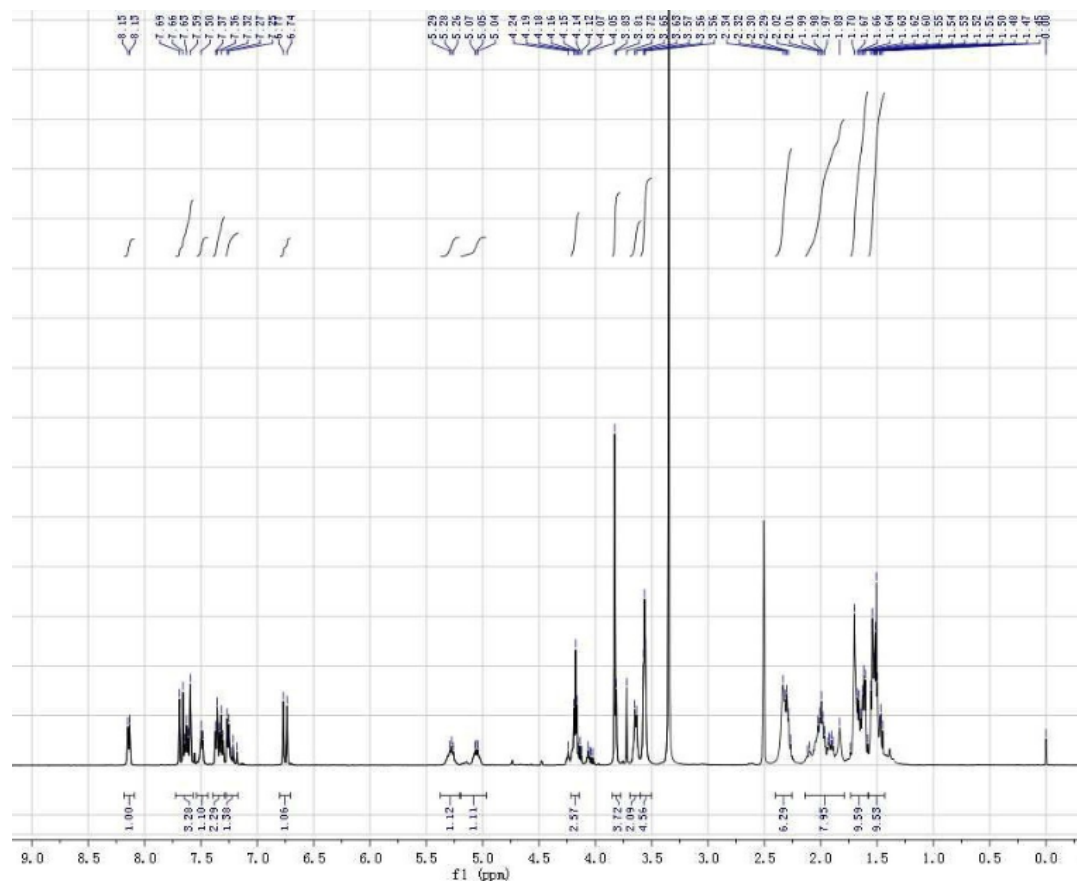

Fig. 3. The  $^1\text{H}$  NMR spectra for **5b**

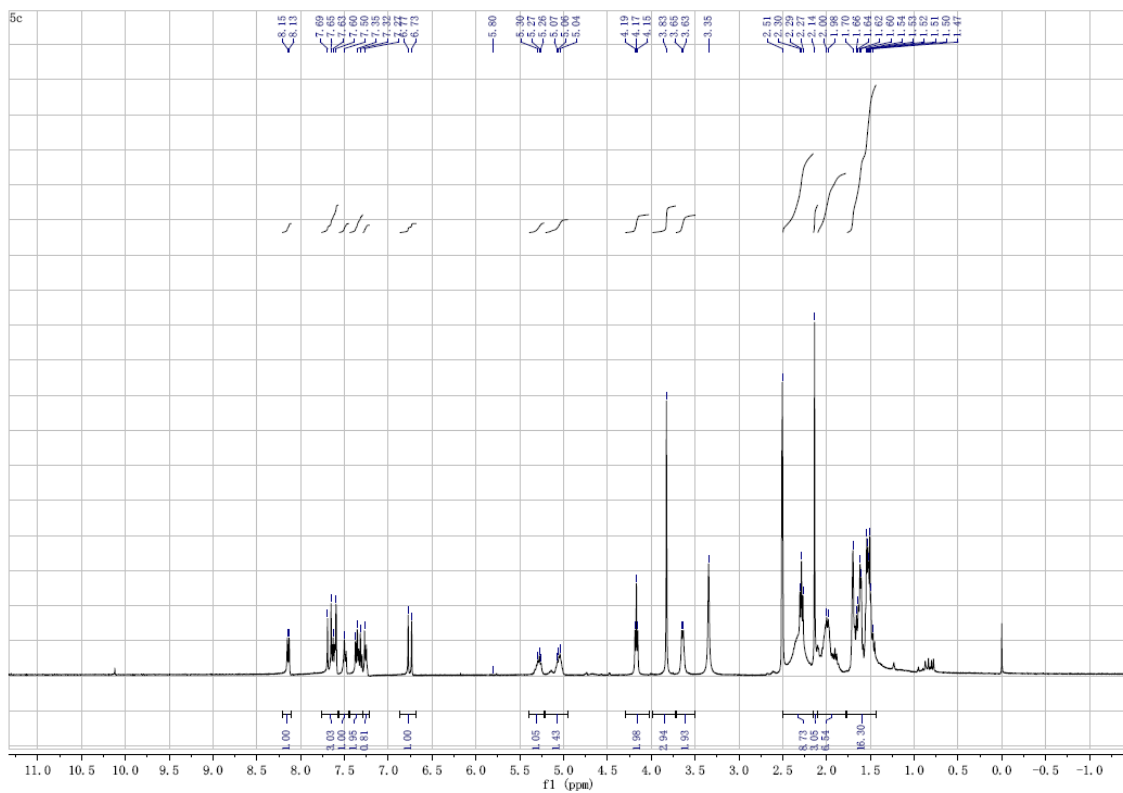

Fig. 4. The  $^1\text{H}$  NMR spectra for **5c**

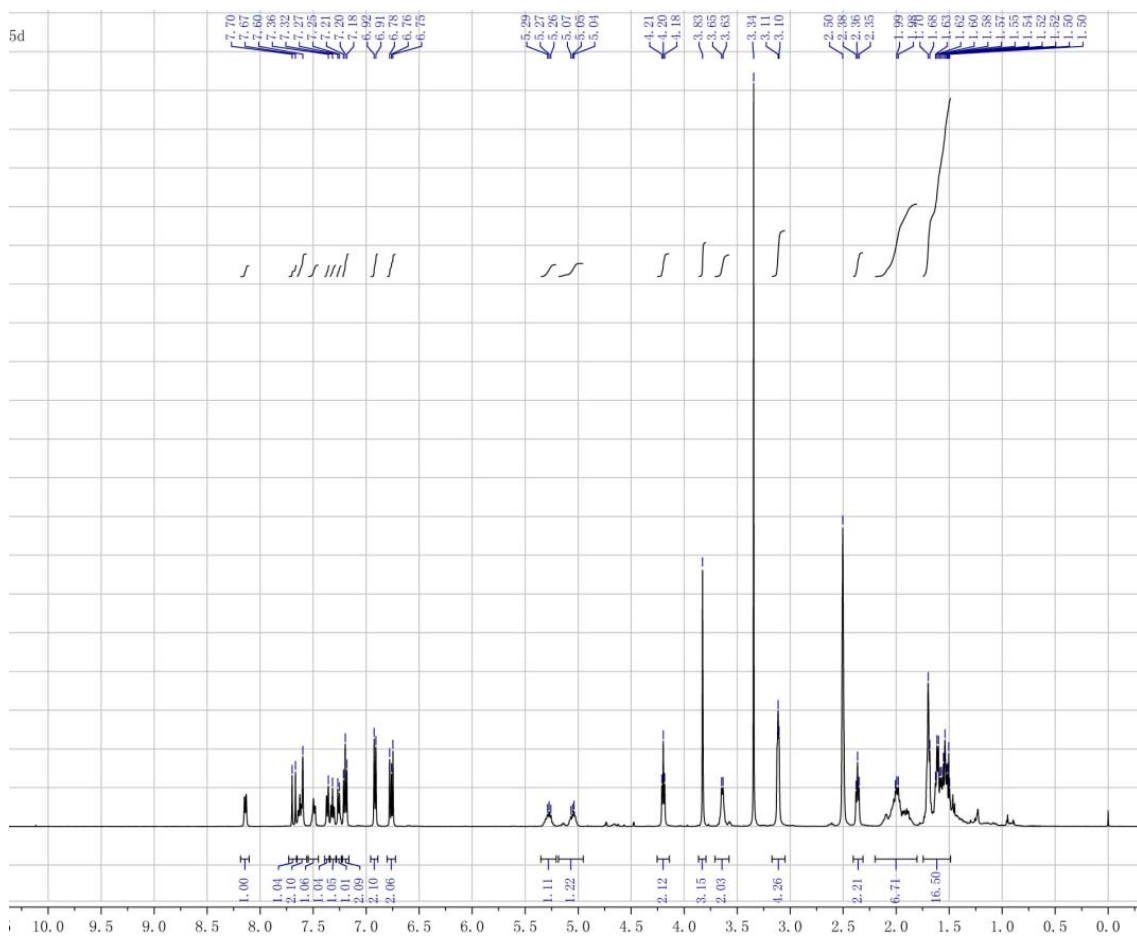

Fig. 5. The  $^1\text{H}$  NMR spectra for **5d**

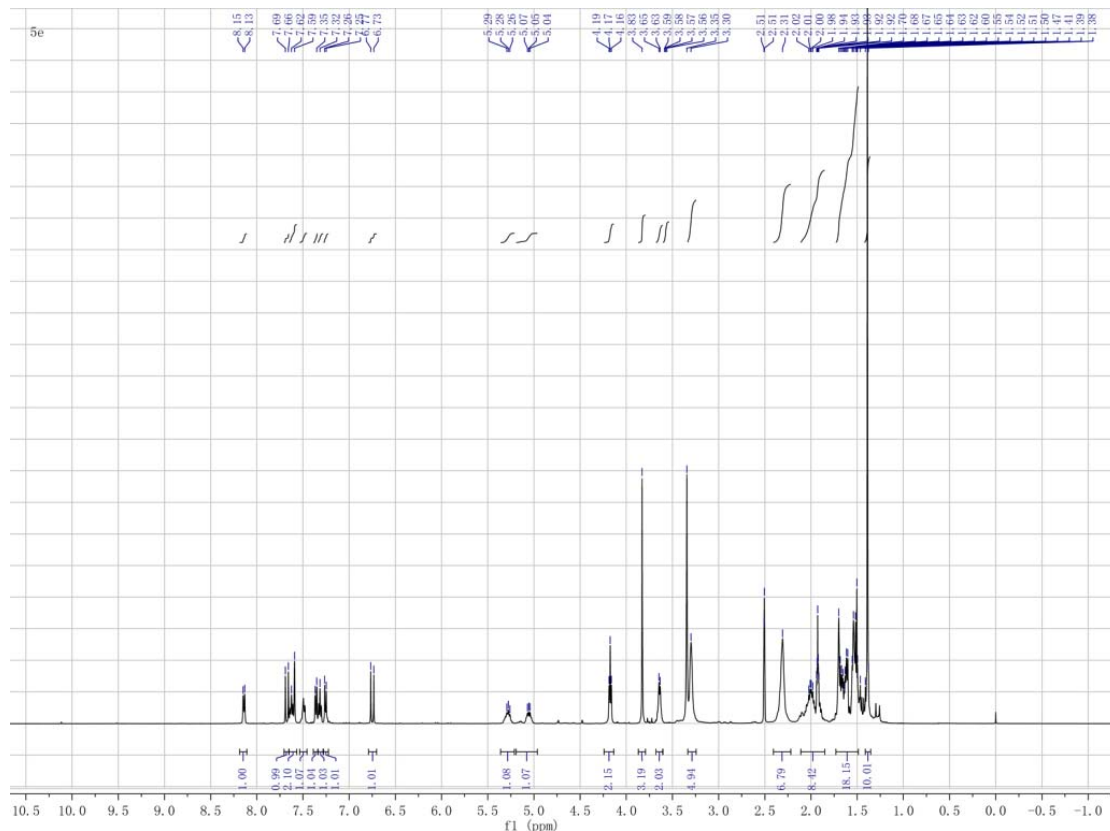

Fig. 6. The  $^1\text{H}$  NMR spectra for **5e**

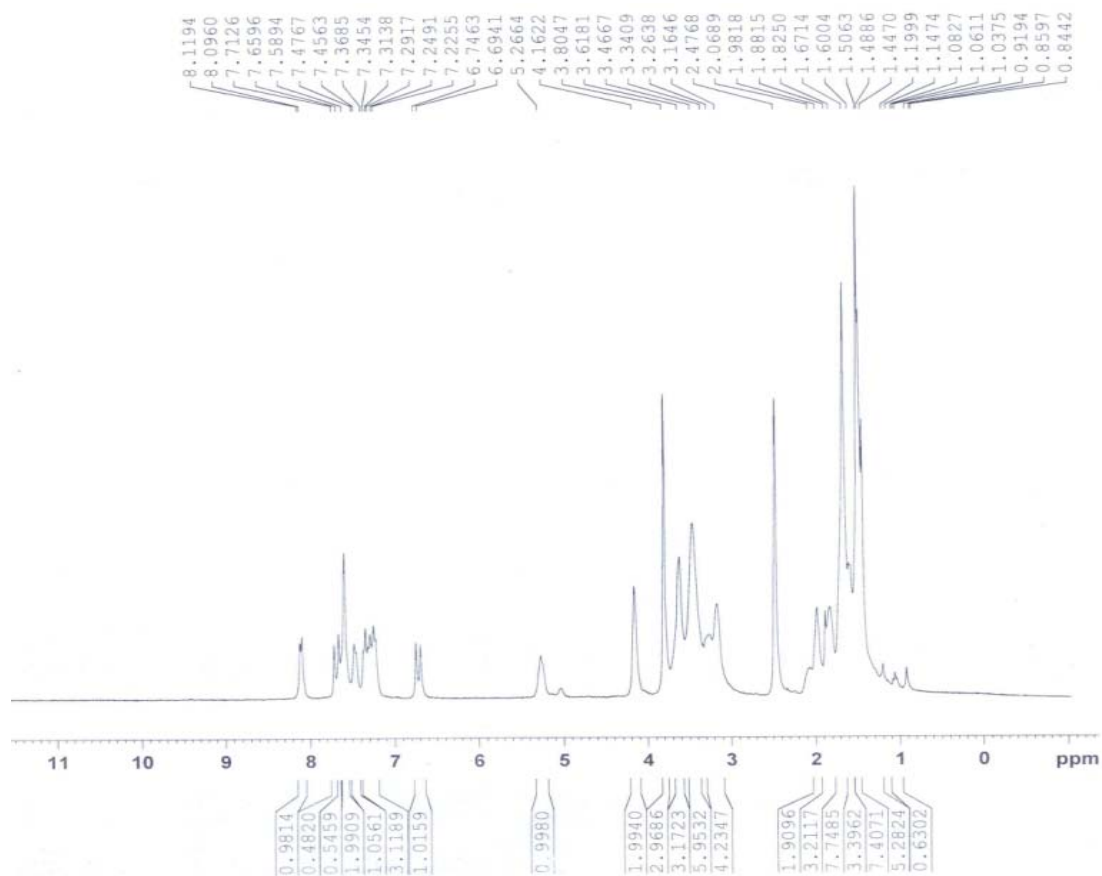

Fig. 7. The  $^1\text{H}$  NMR spectra for **5f**

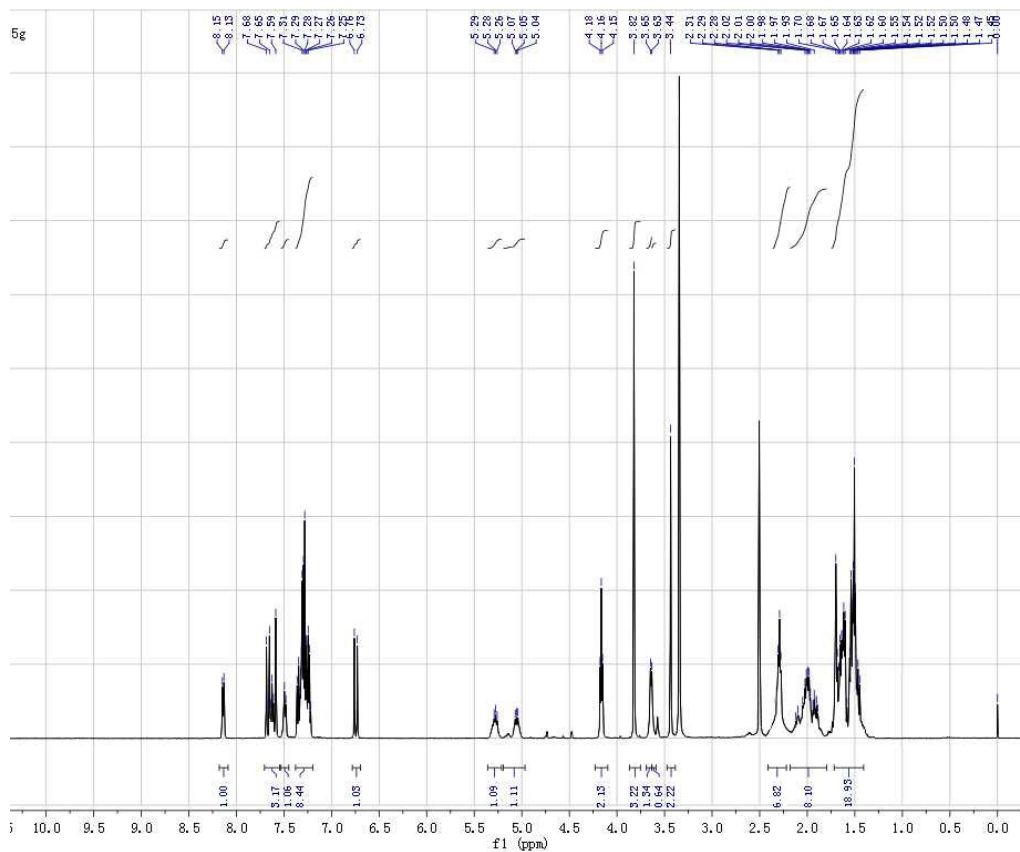

Fig. 8. The  $^1\text{H}$  NMR spectra for **5g**

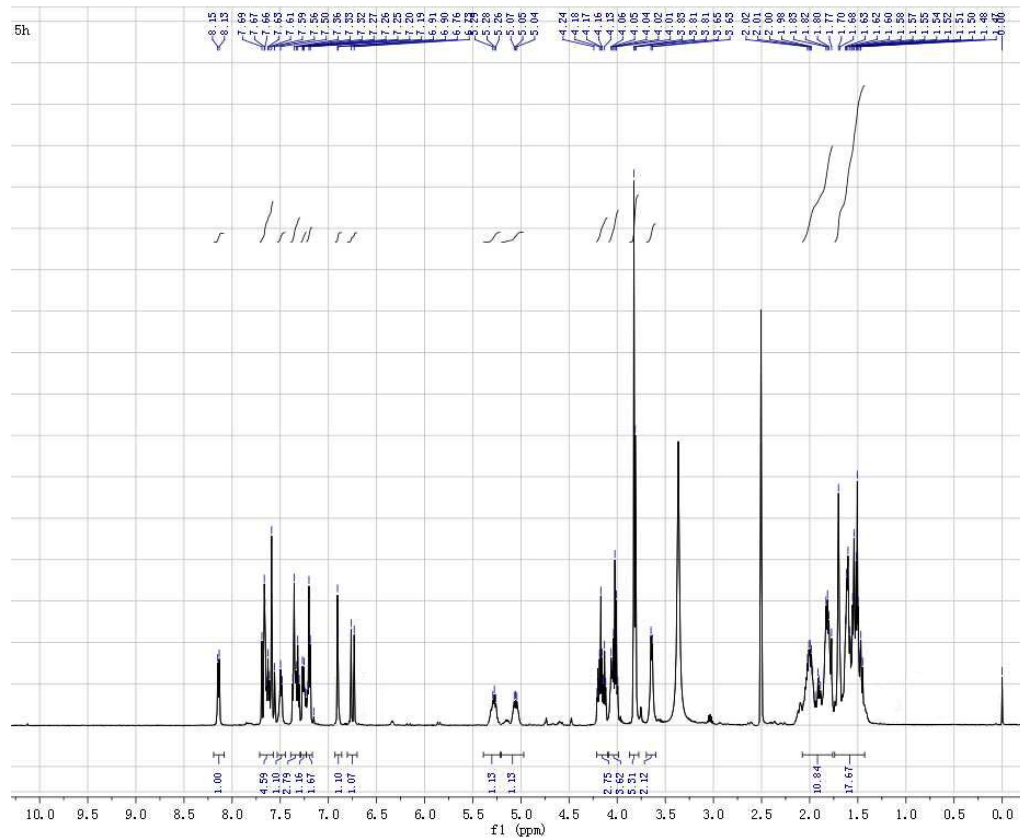

Fig. 9. The  $^1\text{H}$  NMR spectra for **5h**

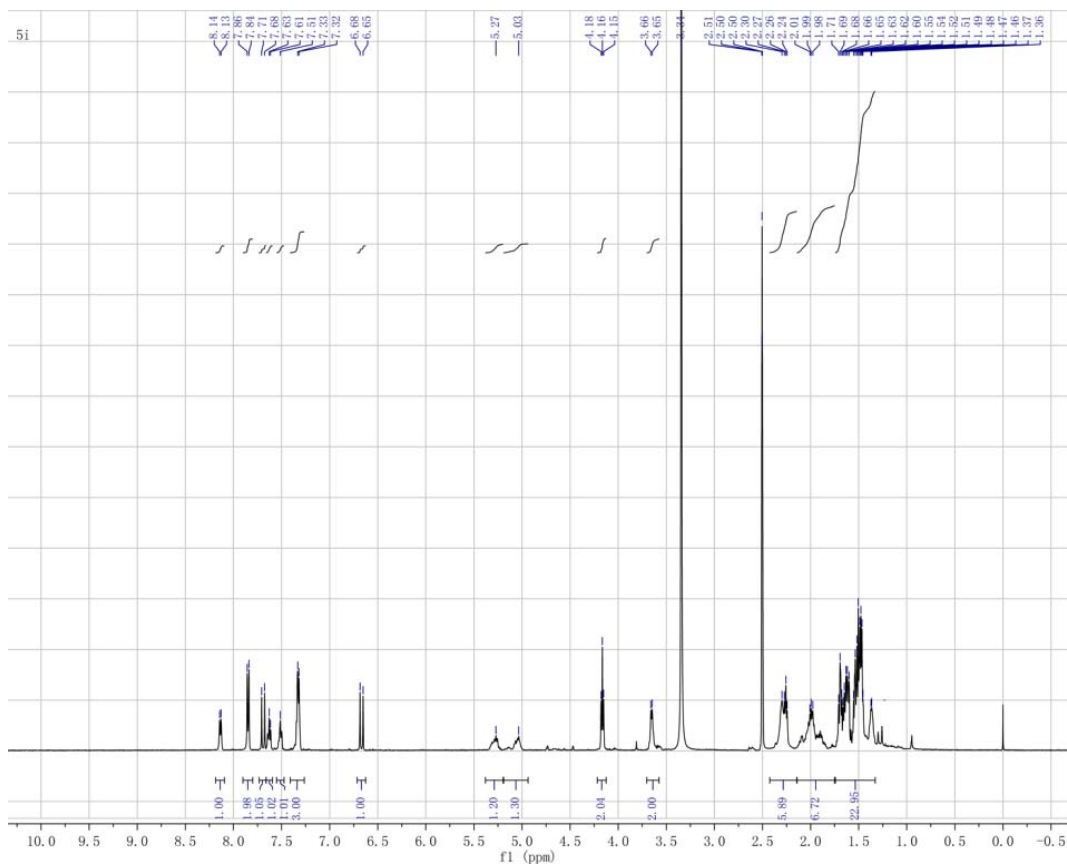

Fig. 10. The  $^1\text{H}$  NMR spectra for **5i**

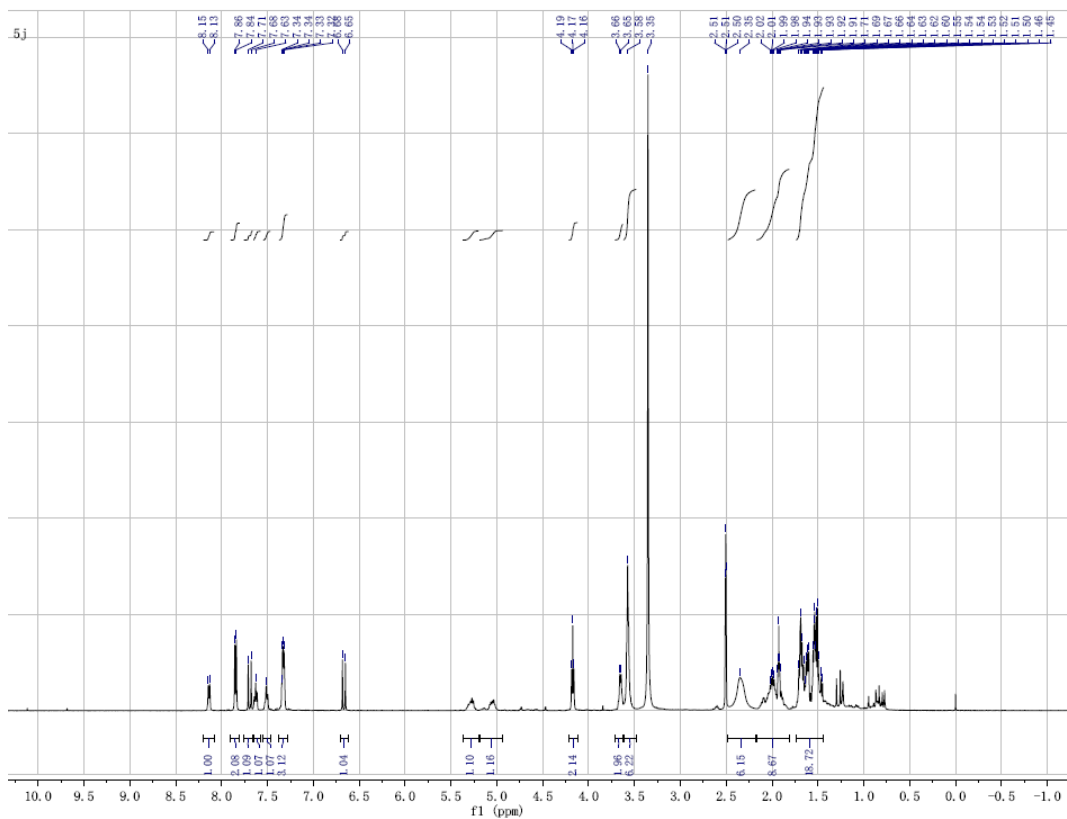

Fig. 11. The  $^1\text{H}$  NMR spectra for **5j**

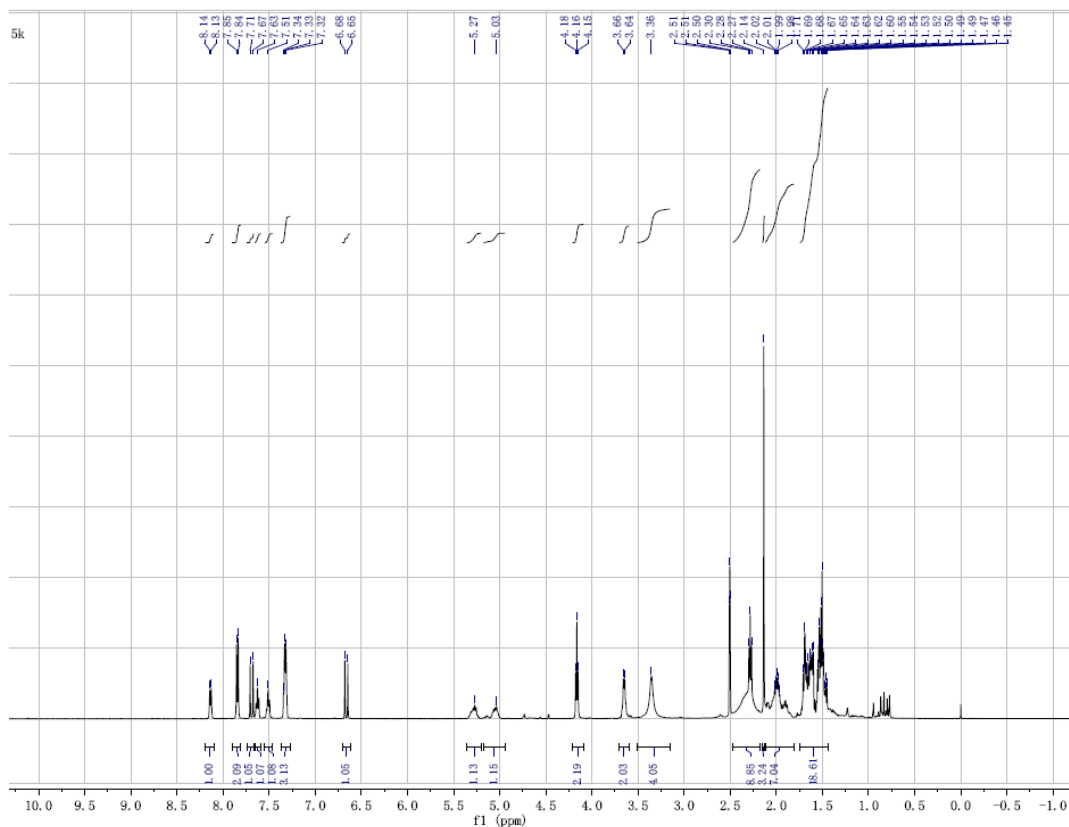

Fig. 12. The  $^1\text{H}$  NMR spectra for **5k**

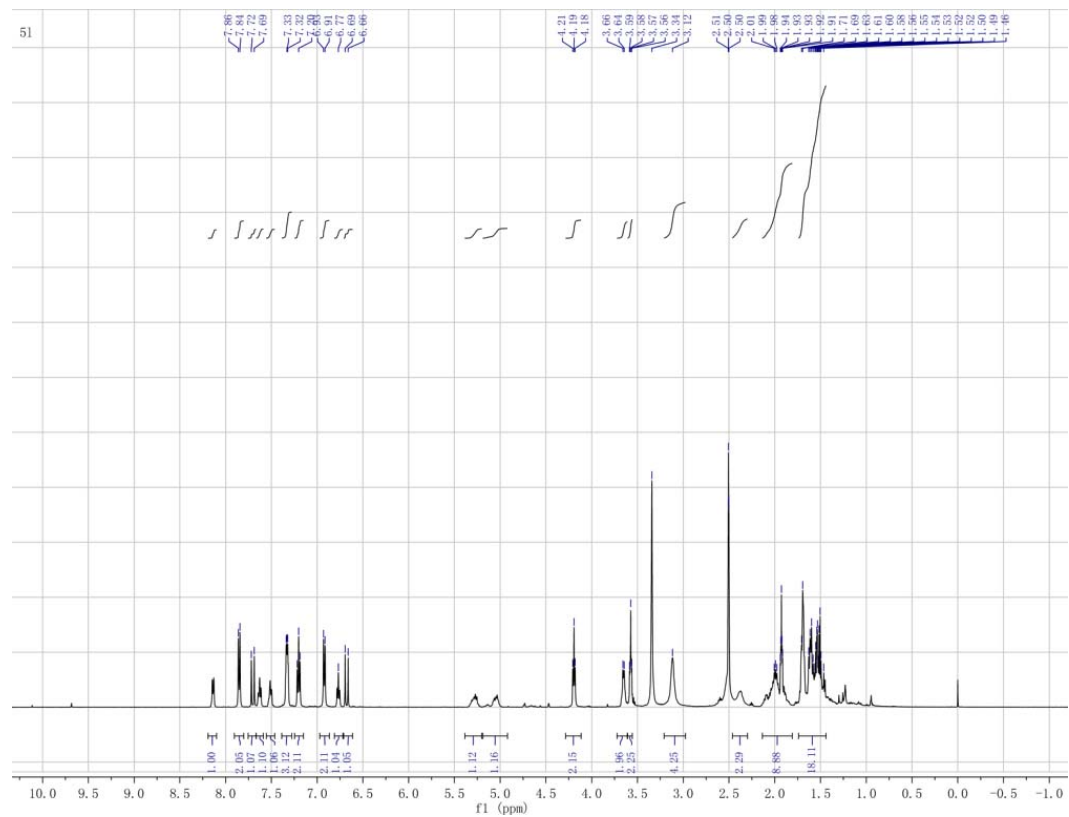

Fig. 13. The  $^1\text{H}$  NMR spectra for **5l**



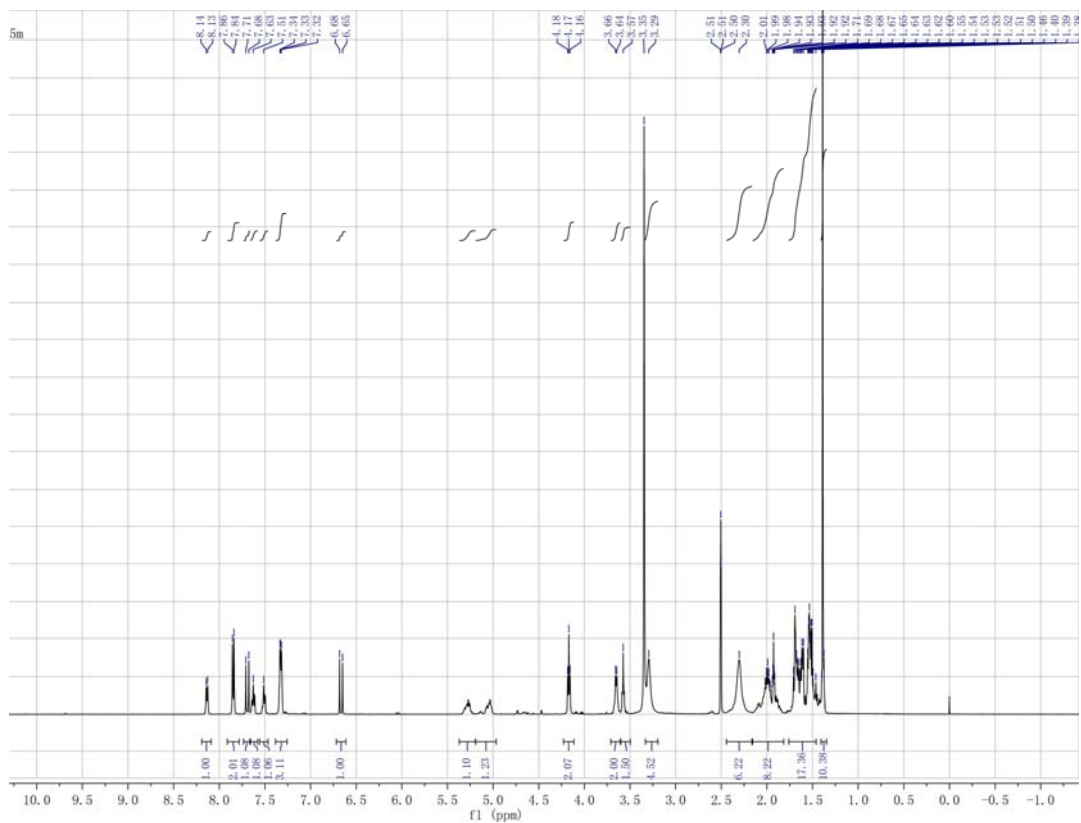

Fig. 14. The  $^1\text{H}$  NMR spectra for **5m**

5n DMSO 1HNMR AV300

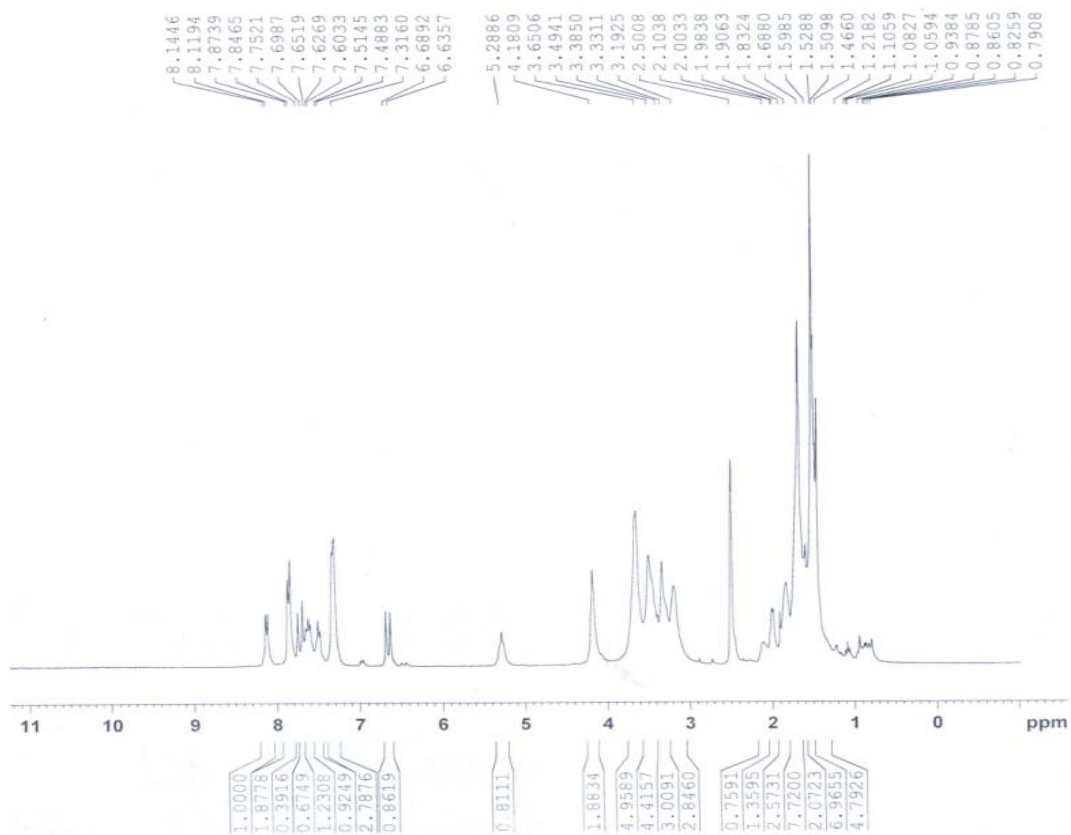

Fig. 15. The  $^1\text{H}$  NMR spectra for **5n**

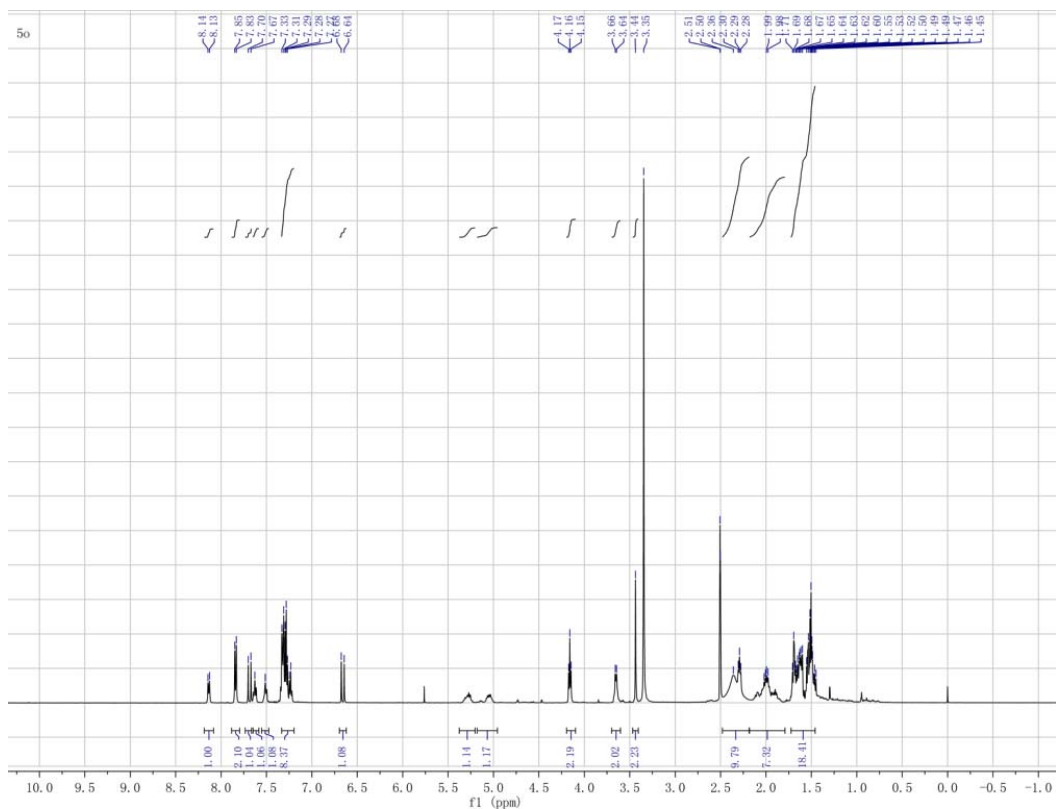

Fig. 16. The  $^1\text{H}$  NMR spectra for **5o**

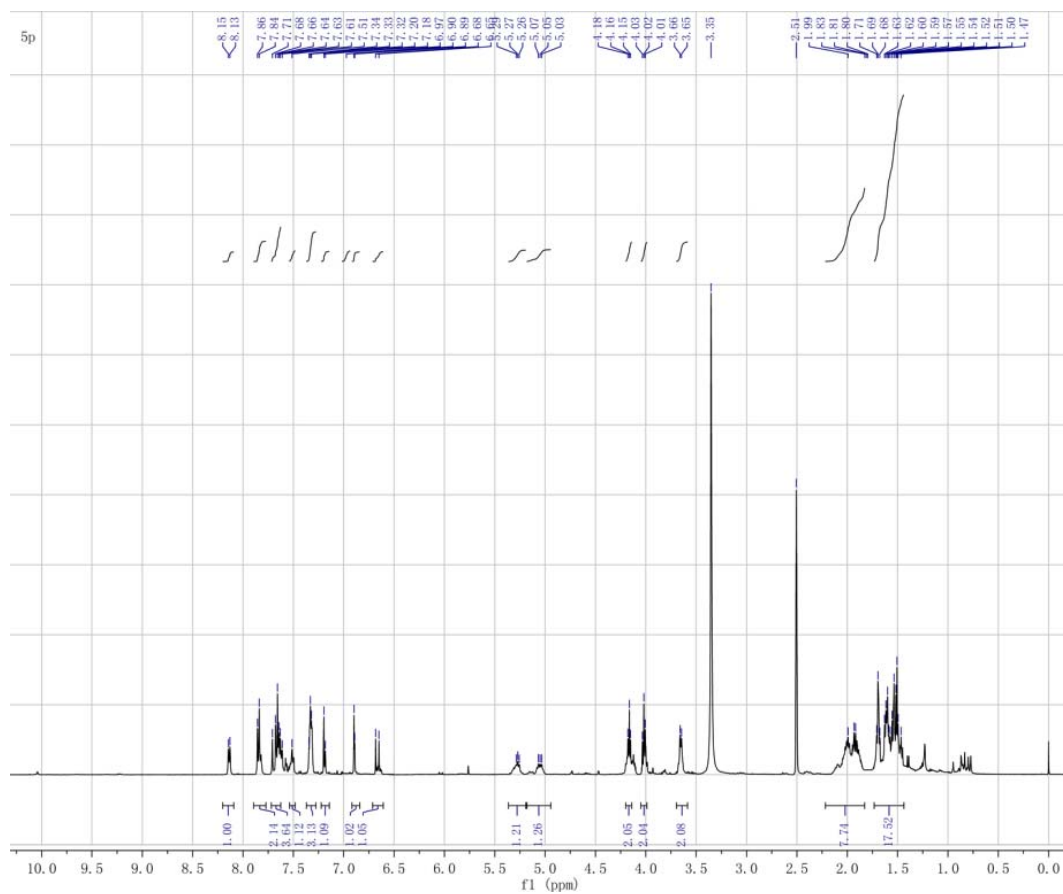

Fig. 17. The  $^1\text{H}$  NMR spectra for **5p**

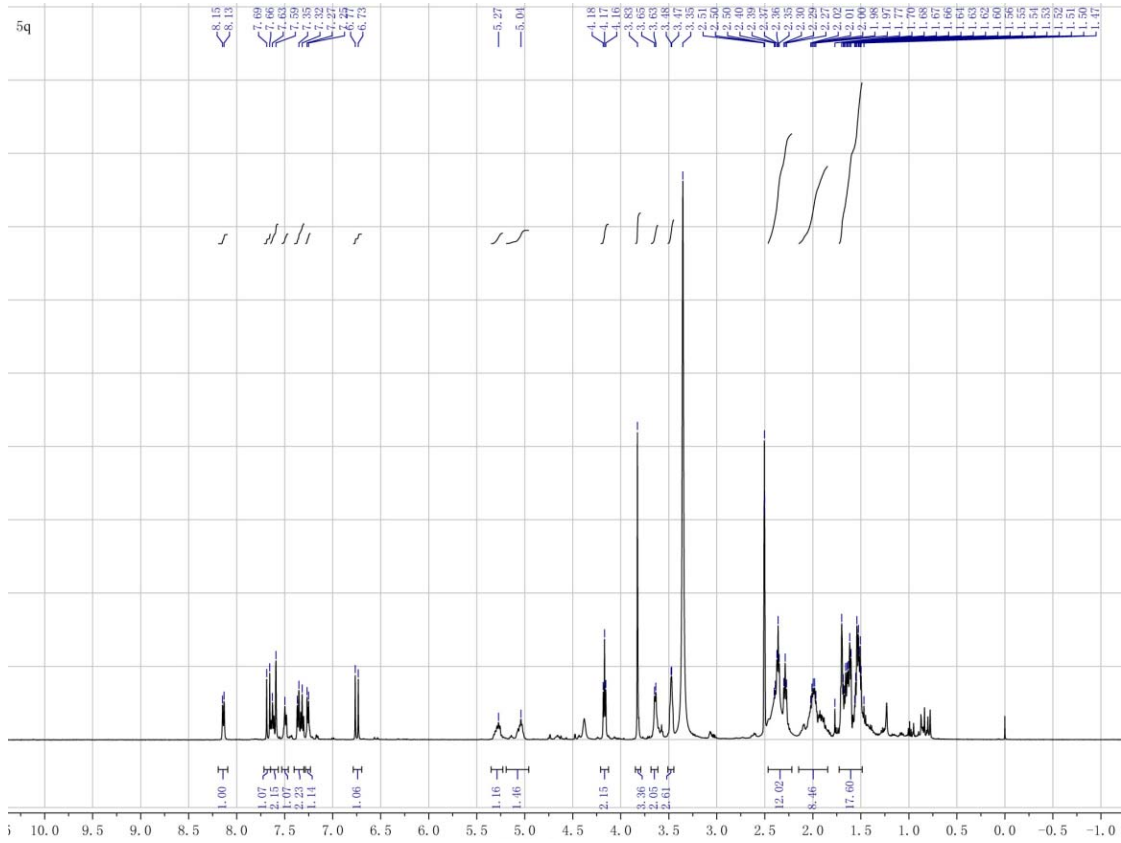

Fig. 19. The  $^1\text{H}$  NMR spectra for **5q**

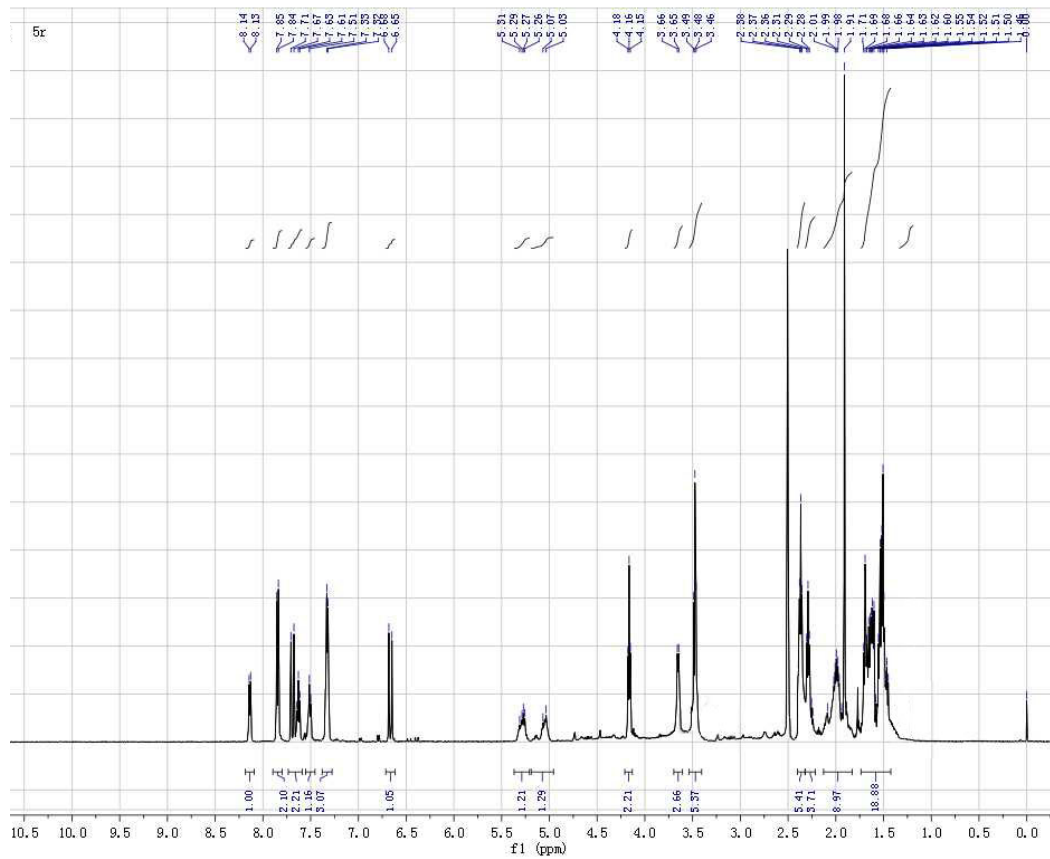

Fig. 19. The  $^1\text{H}$  NMR spectra for **5r**

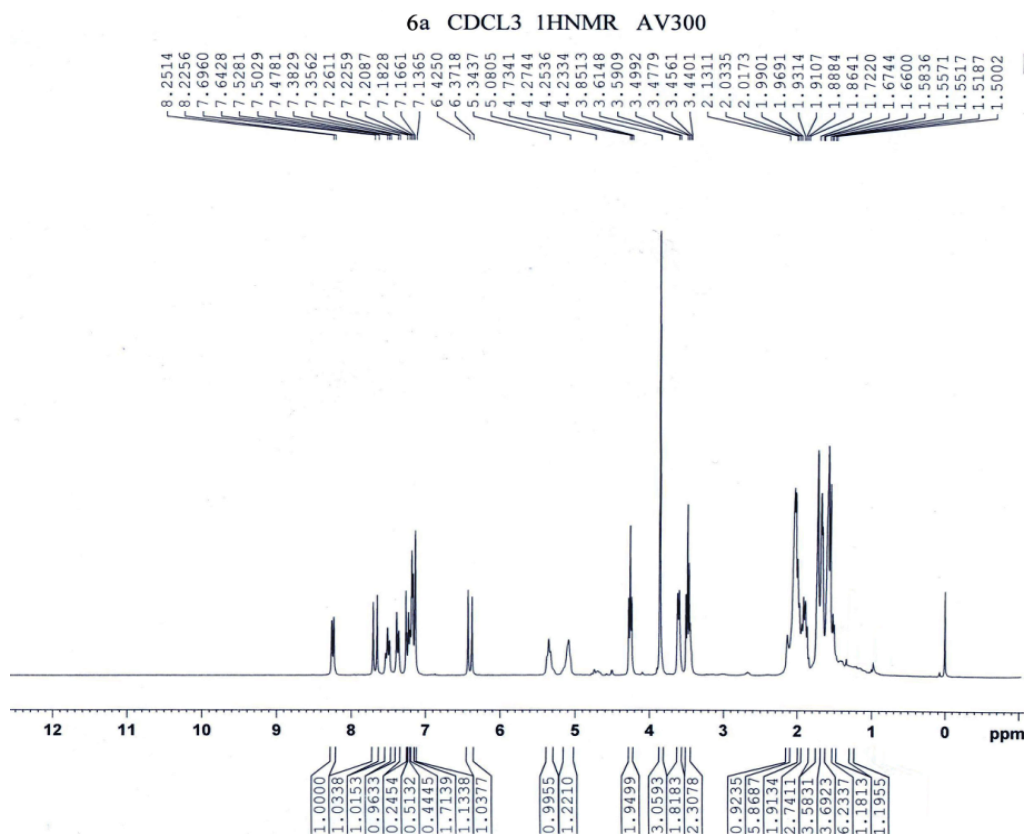

**Fig. 20.** The <sup>1</sup>H NMR spectra for **6a**

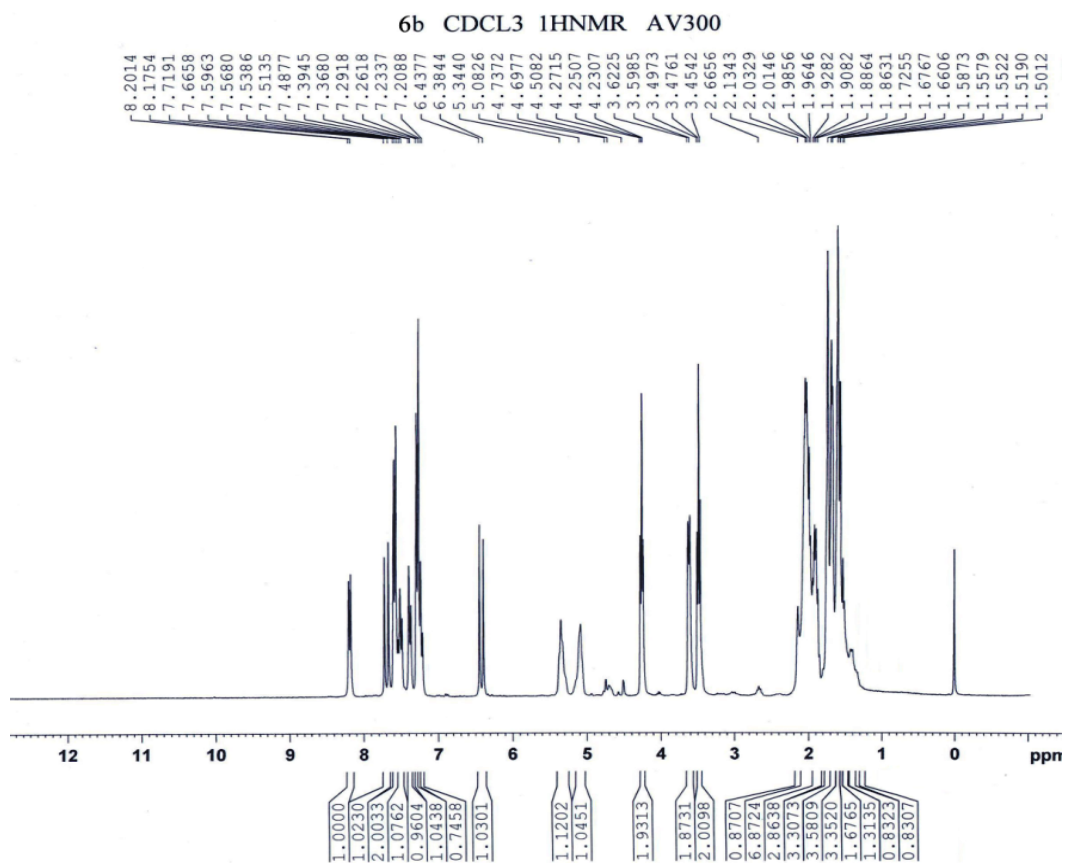

**Fig. 21.** The <sup>1</sup>H NMR spectra for **6b**

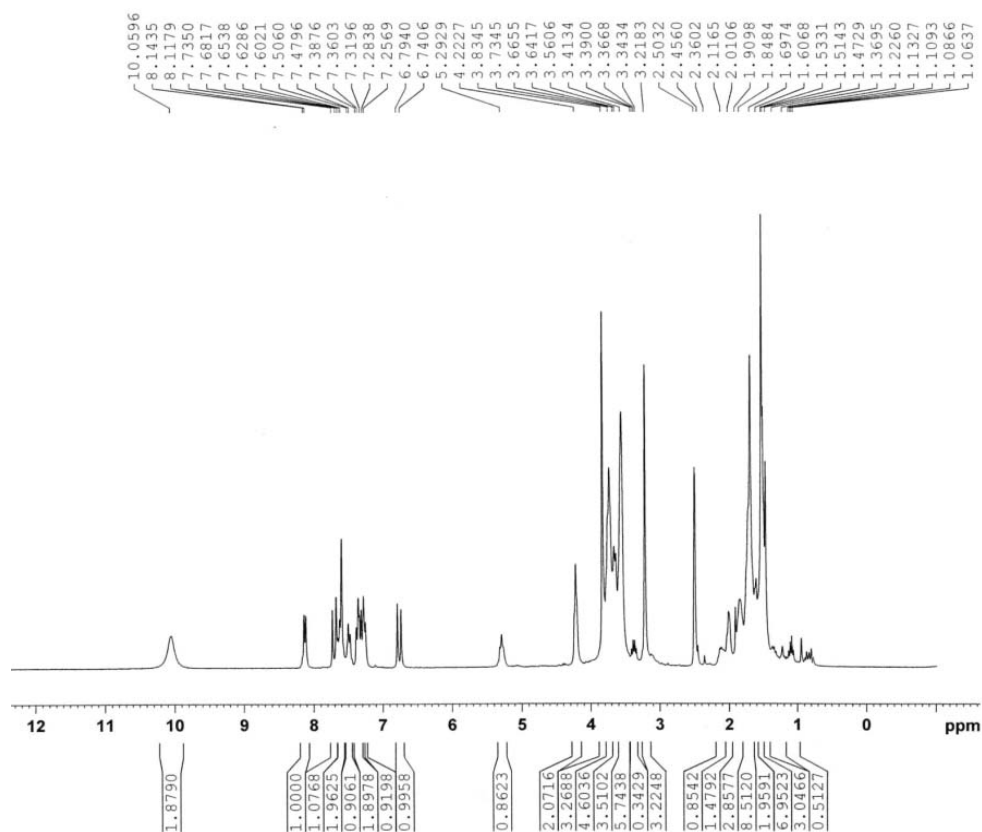

Fig. 22. The  $^1\text{H}$  NMR spectra for **7b**

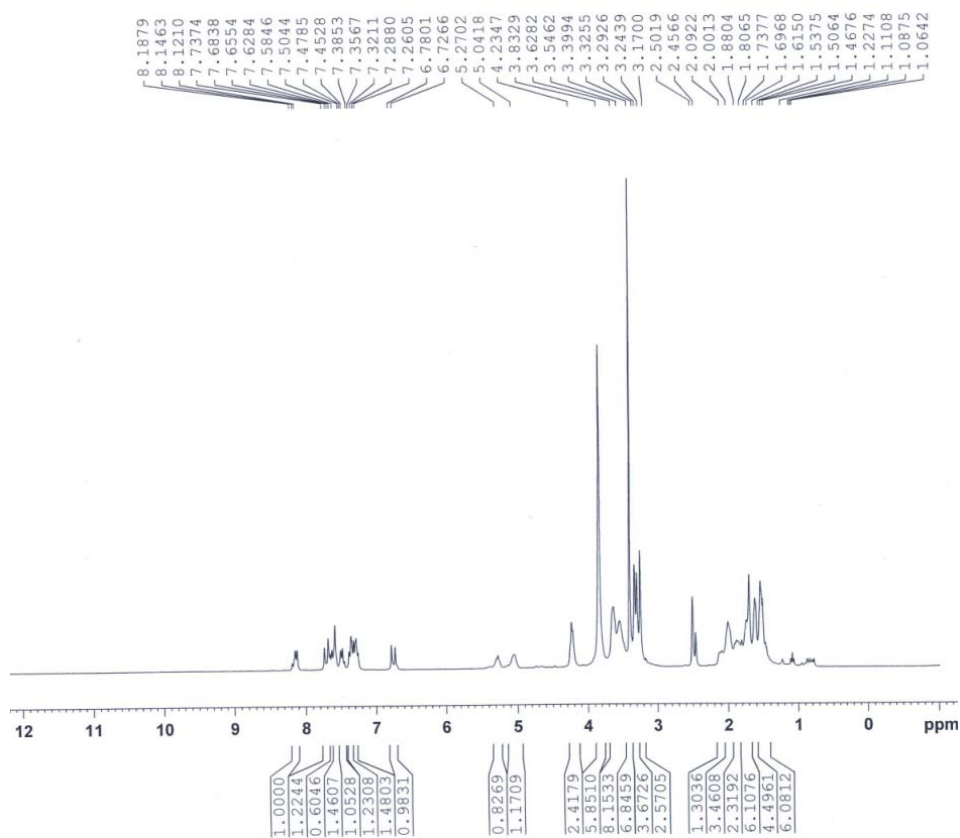

Fig. 23. The  $^1\text{H}$  NMR spectra for **7c**

The  $^{13}\text{C}$  NMR spectra for **5a-5r**

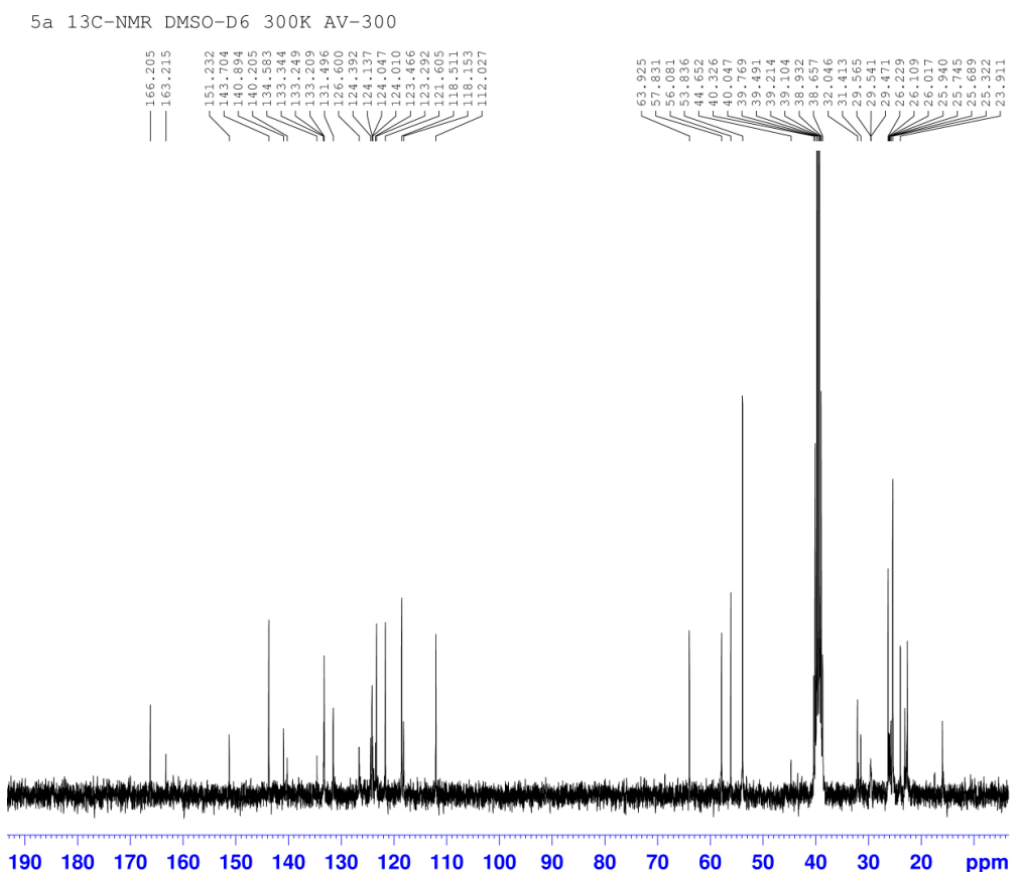

Fig. 24. The  $^{13}\text{C}$  NMR spectra for **5a**

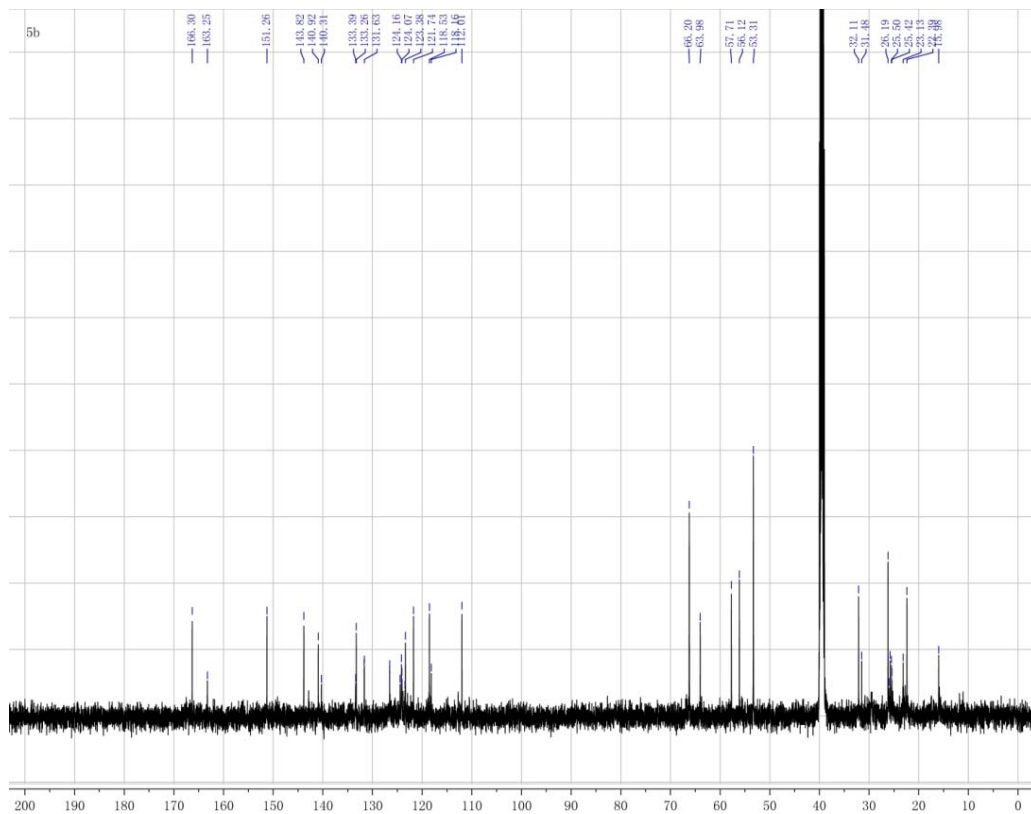

Fig. 25. The  $^{13}\text{C}$  NMR spectra for **5b**

5c <sup>13</sup>C-NMR DMSO-D6 300K AV-300

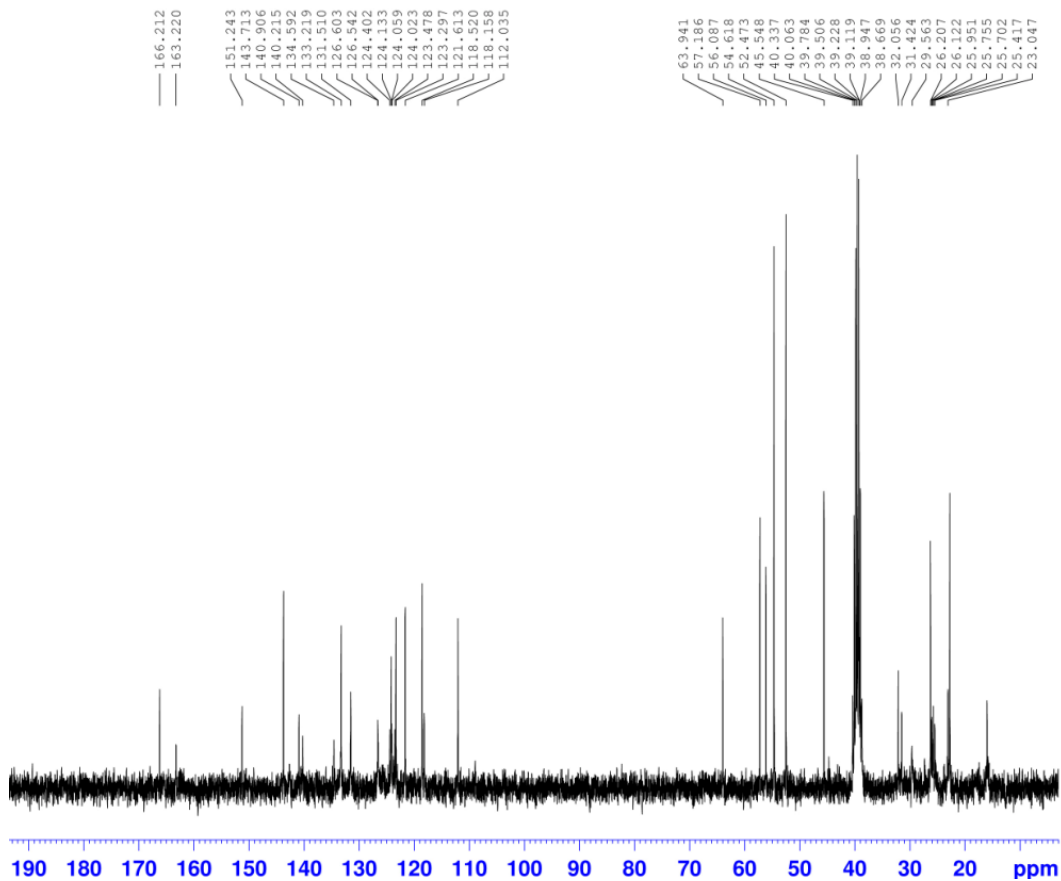

Fig. 26. The <sup>13</sup>C NMR spectra for 5c

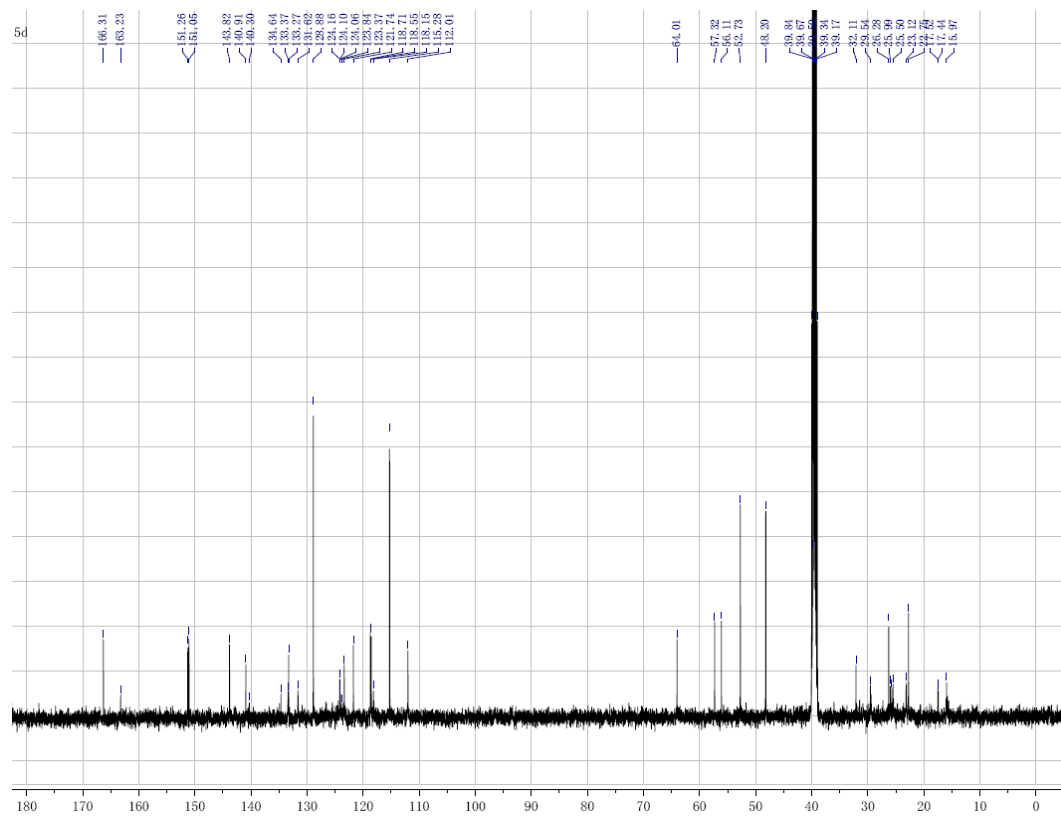

Fig. 27. The <sup>13</sup>C NMR spectra for 5d

5E <sup>13</sup>C-NMR DMSO-D6 300K AV-300

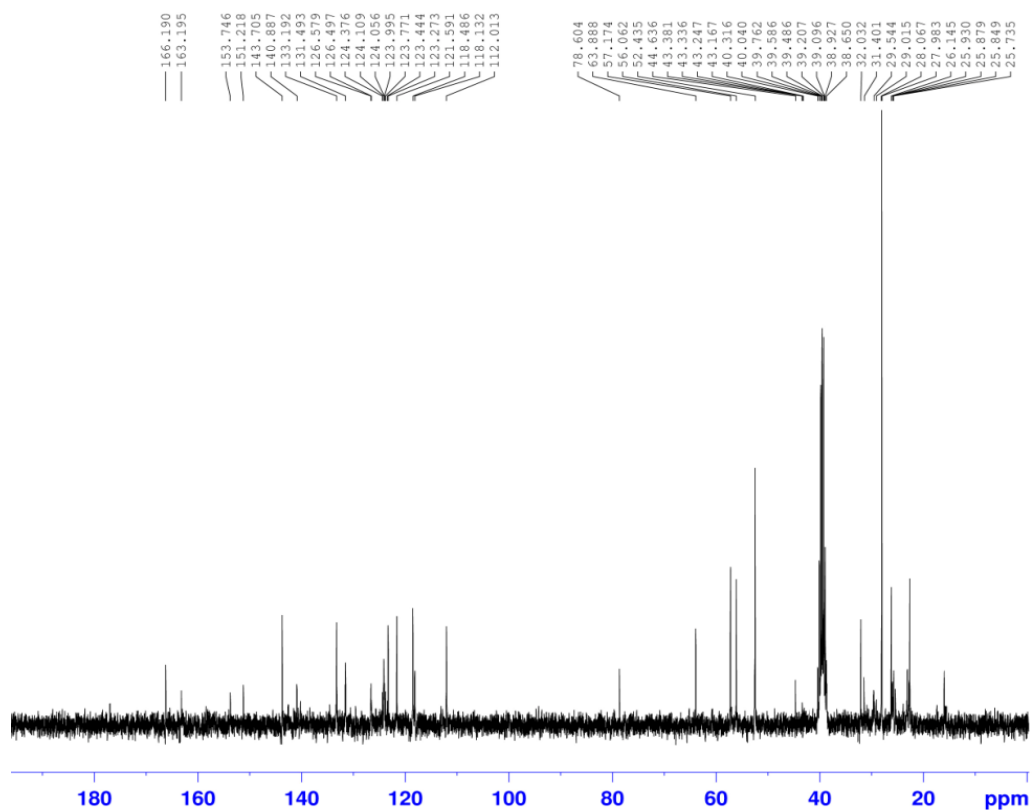

Fig. 28. The <sup>13</sup>C NMR spectra for 5e

5f <sup>13</sup>C-NMR DMSO-D6 300K AV-300

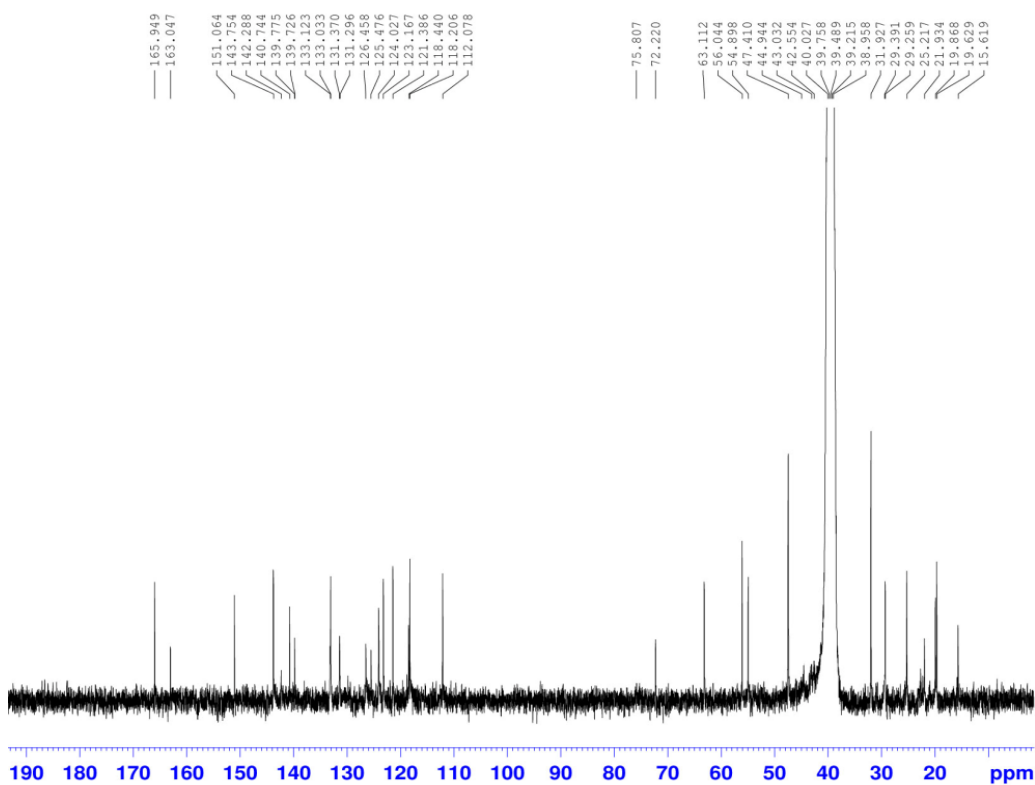

Fig. 29. The <sup>13</sup>C NMR spectra for 5f



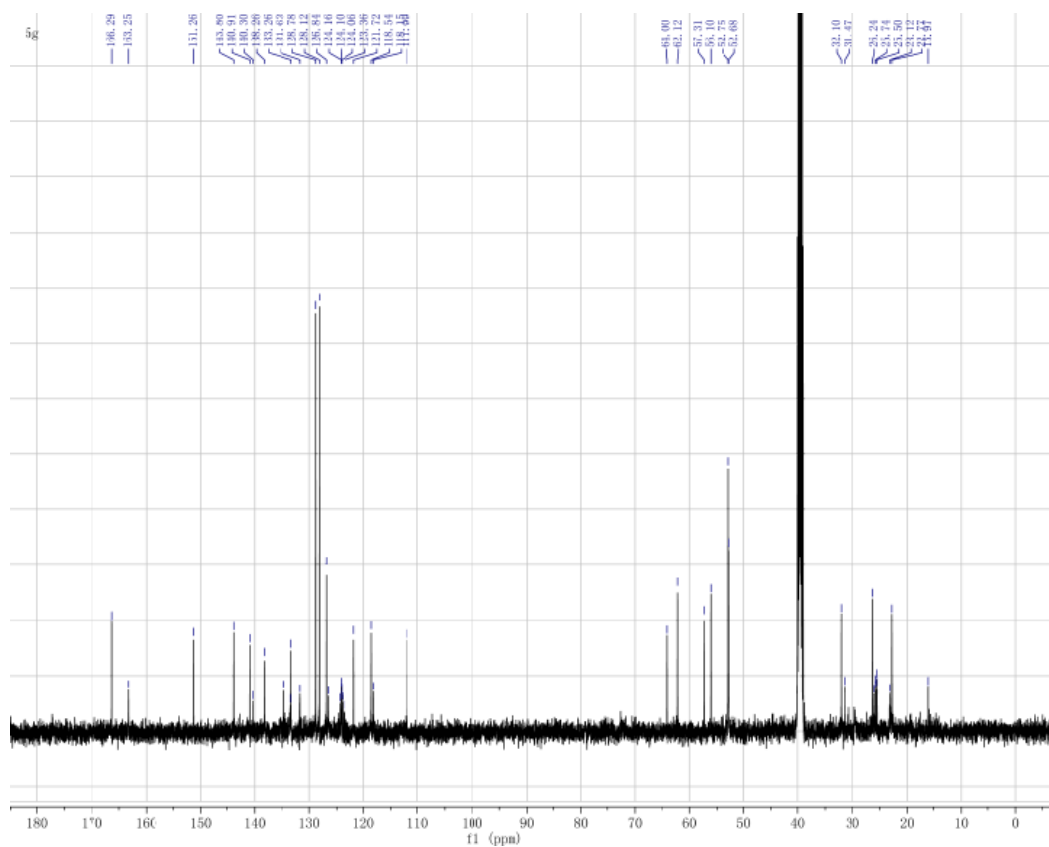

Fig. 30. The  $^{13}\text{C}$  NMR spectra for **5g**

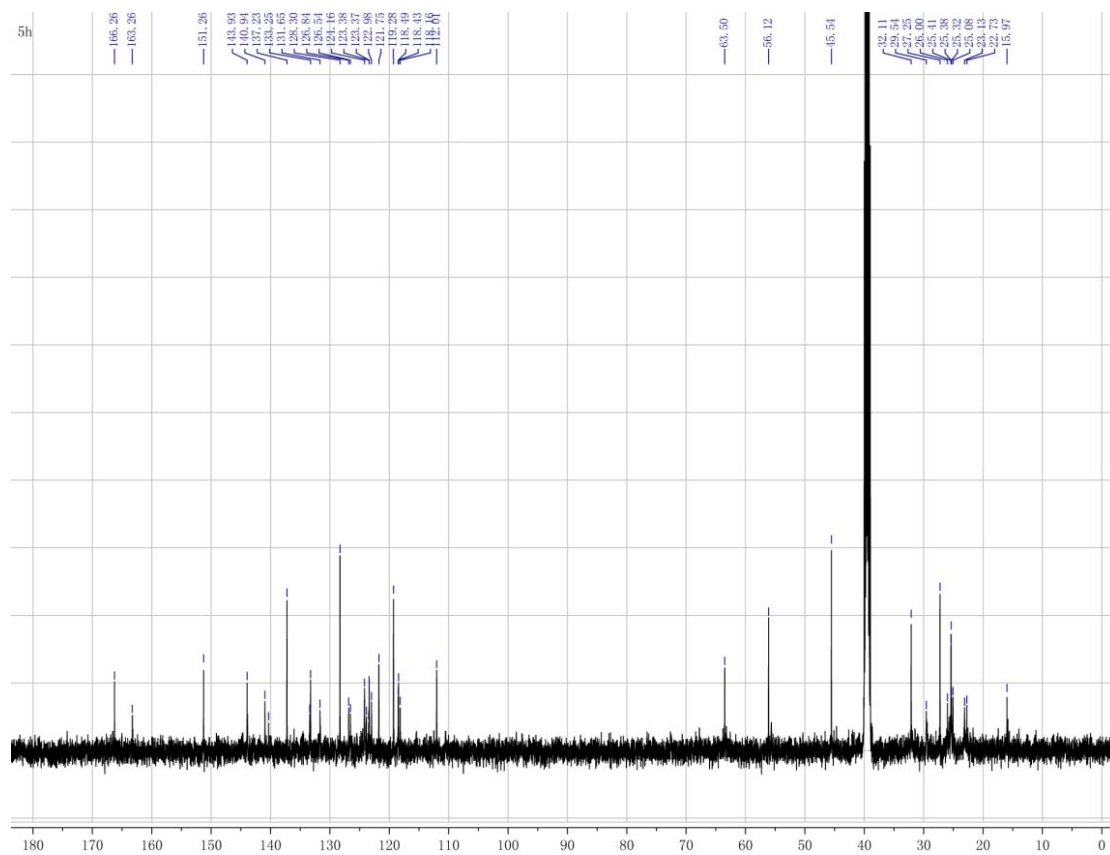

Fig. 31. The  $^{13}\text{C}$  NMR spectra for **5h**

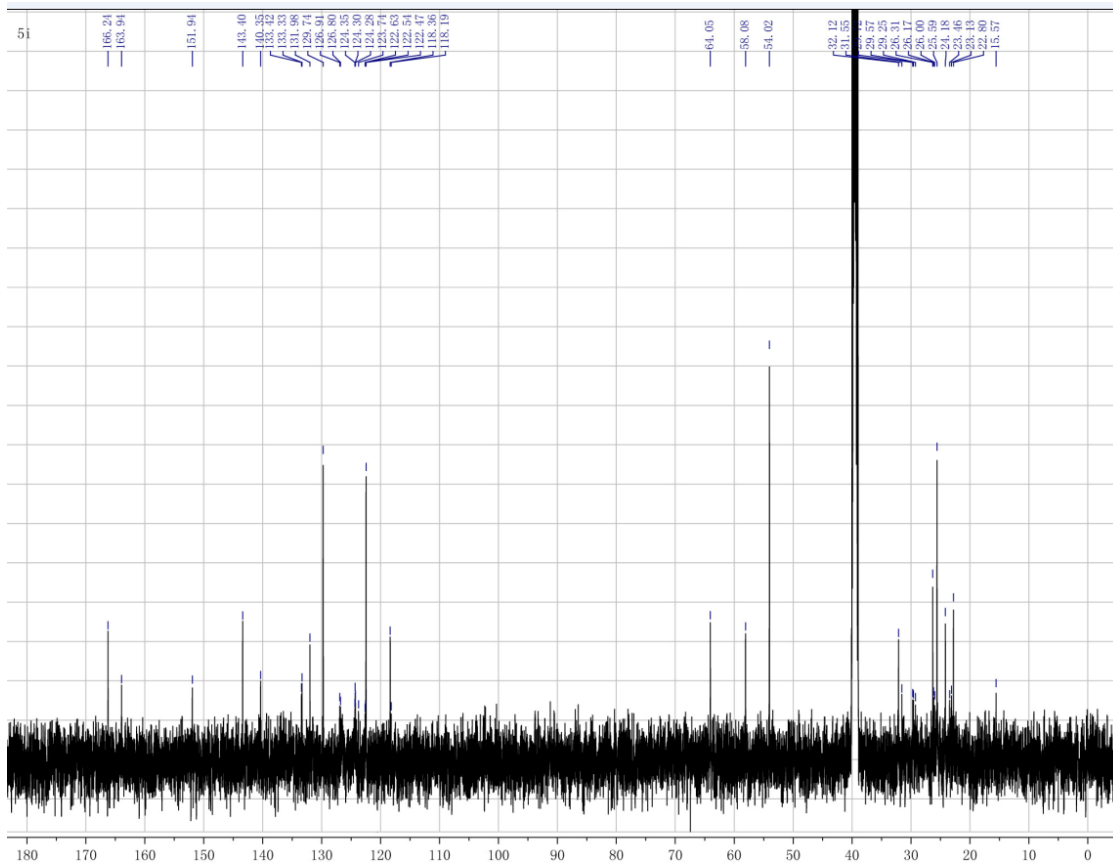

Fig. 32. The  $^{13}\text{C}$  NMR spectra for **5i**

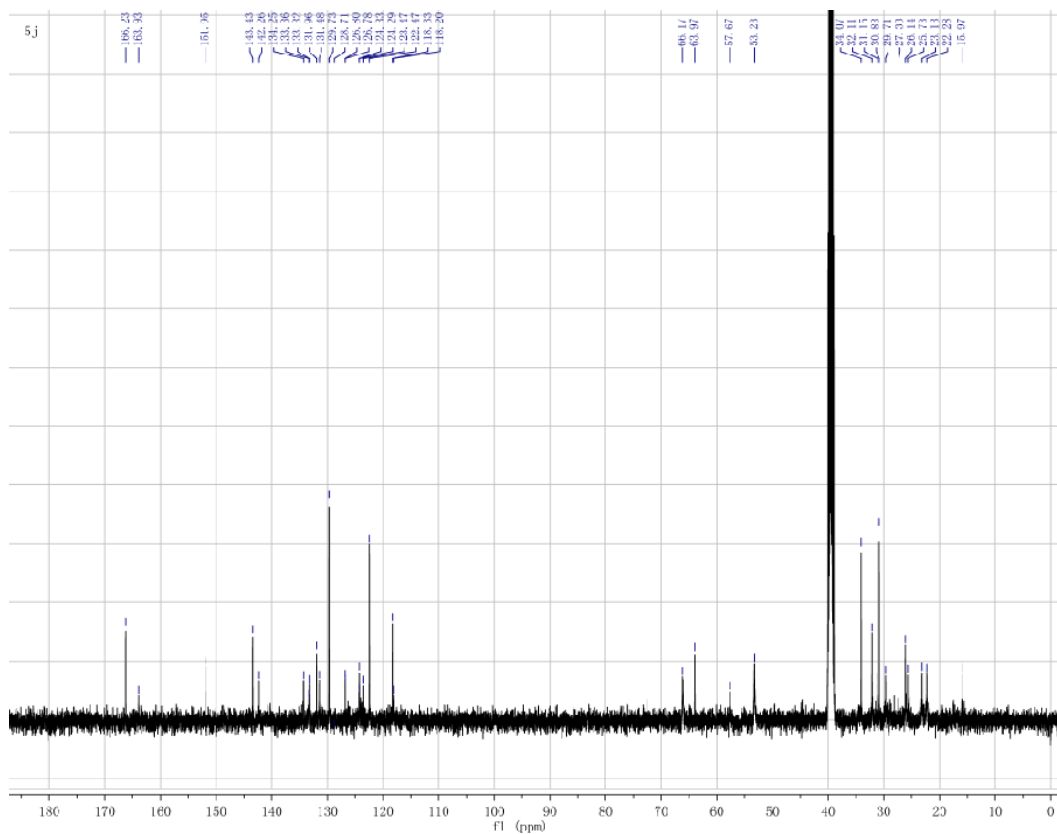

Fig. 33. The  $^{13}\text{C}$  NMR spectra for **5j**

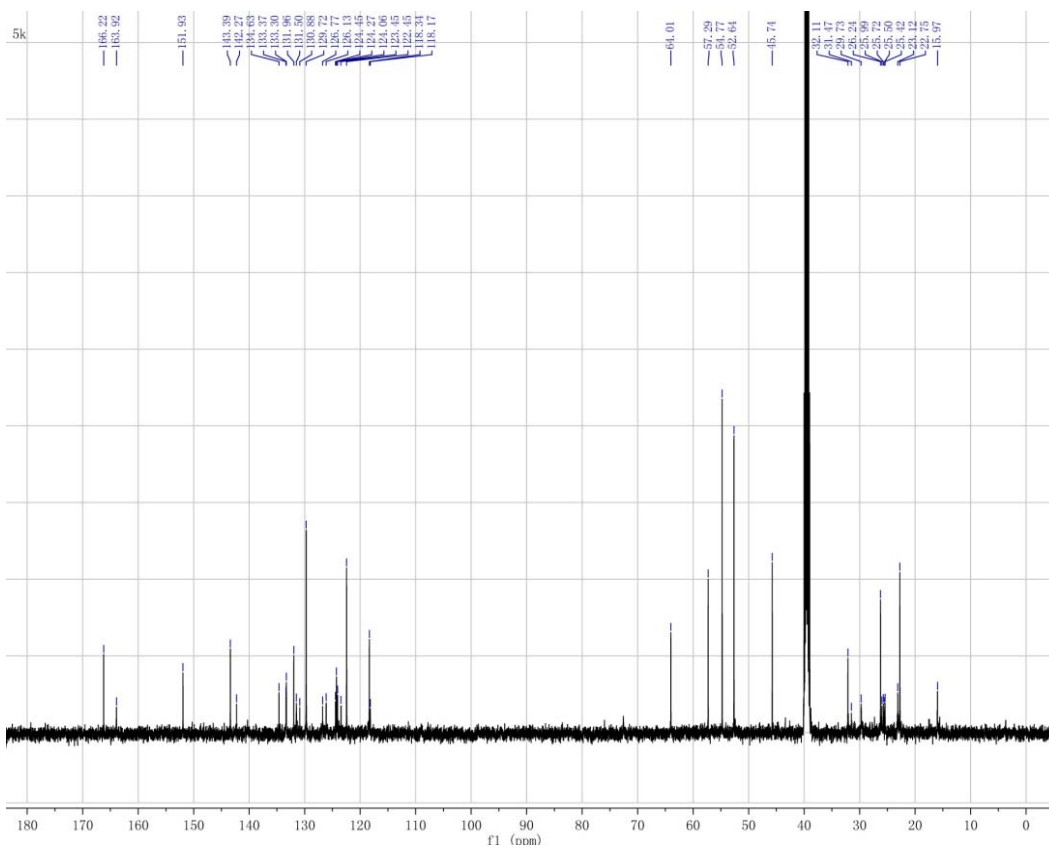

Fig. 34. The  $^{13}\text{C}$  NMR spectra for **5k**

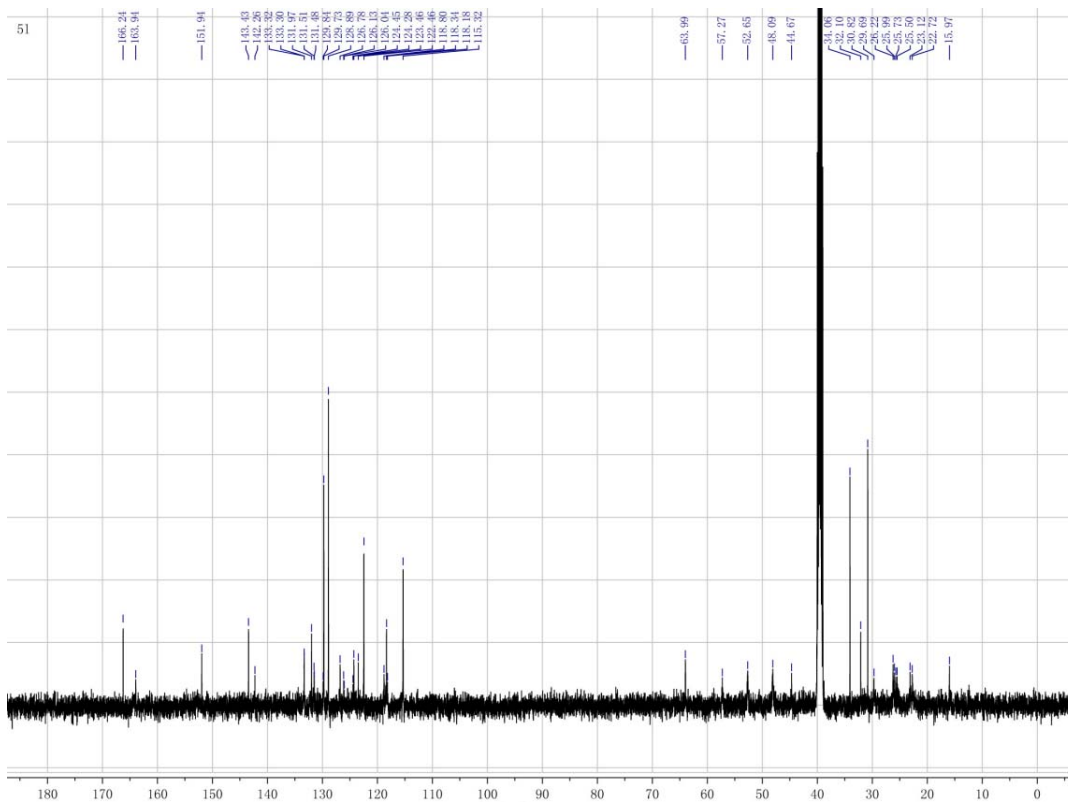

Fig. 35. The  $^{13}\text{C}$  NMR spectra for **5l**

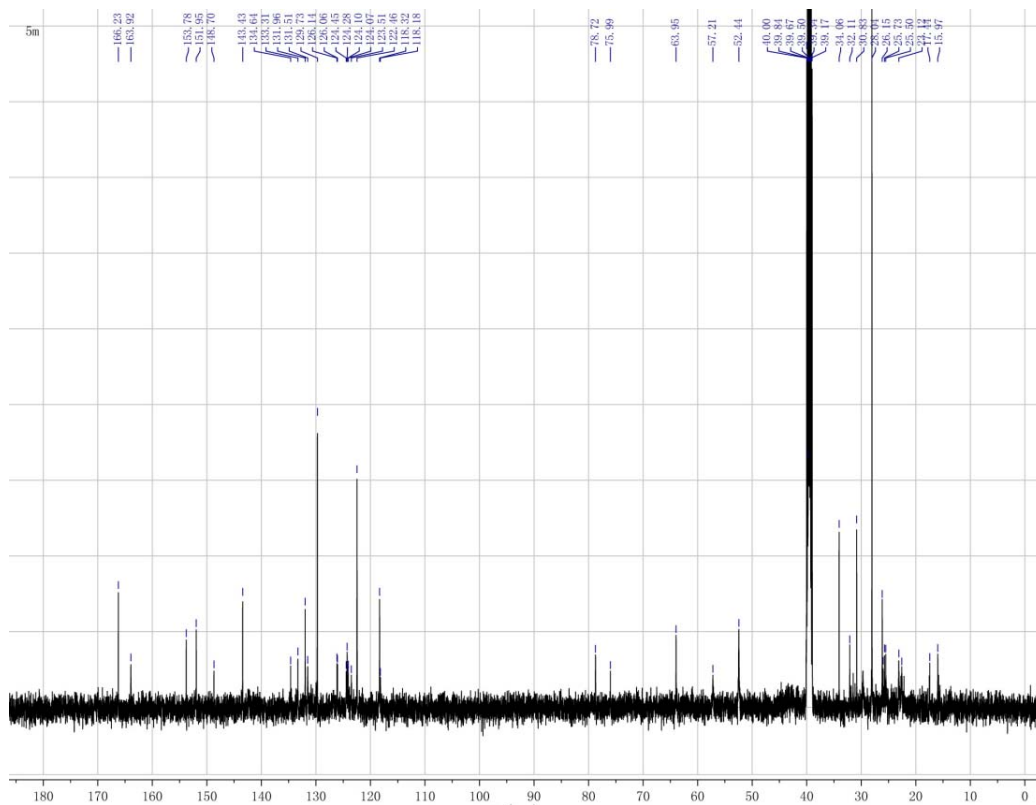

Fig. 36. The  $^{13}\text{C}$  NMR spectra for **5m**

5n  $^{13}\text{C}$ -NMR DMSO-D6 300K AV-300

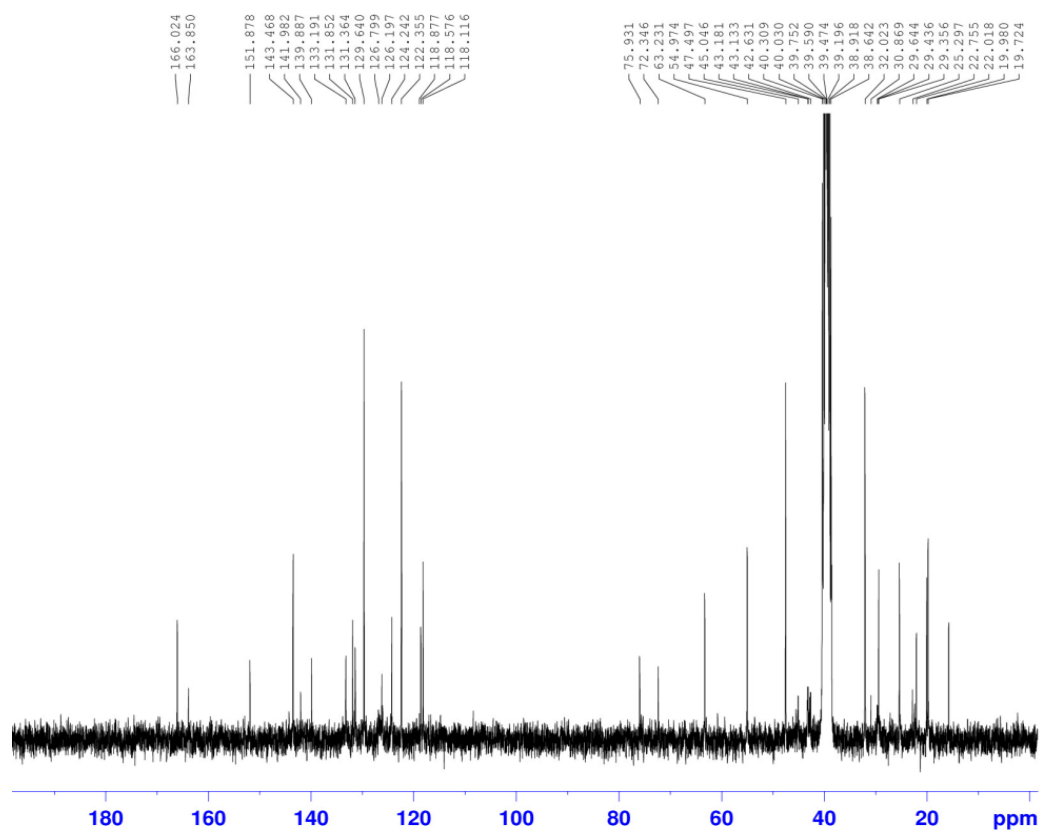

Fig. 37. The  $^{13}\text{C}$  NMR spectra for **5n**

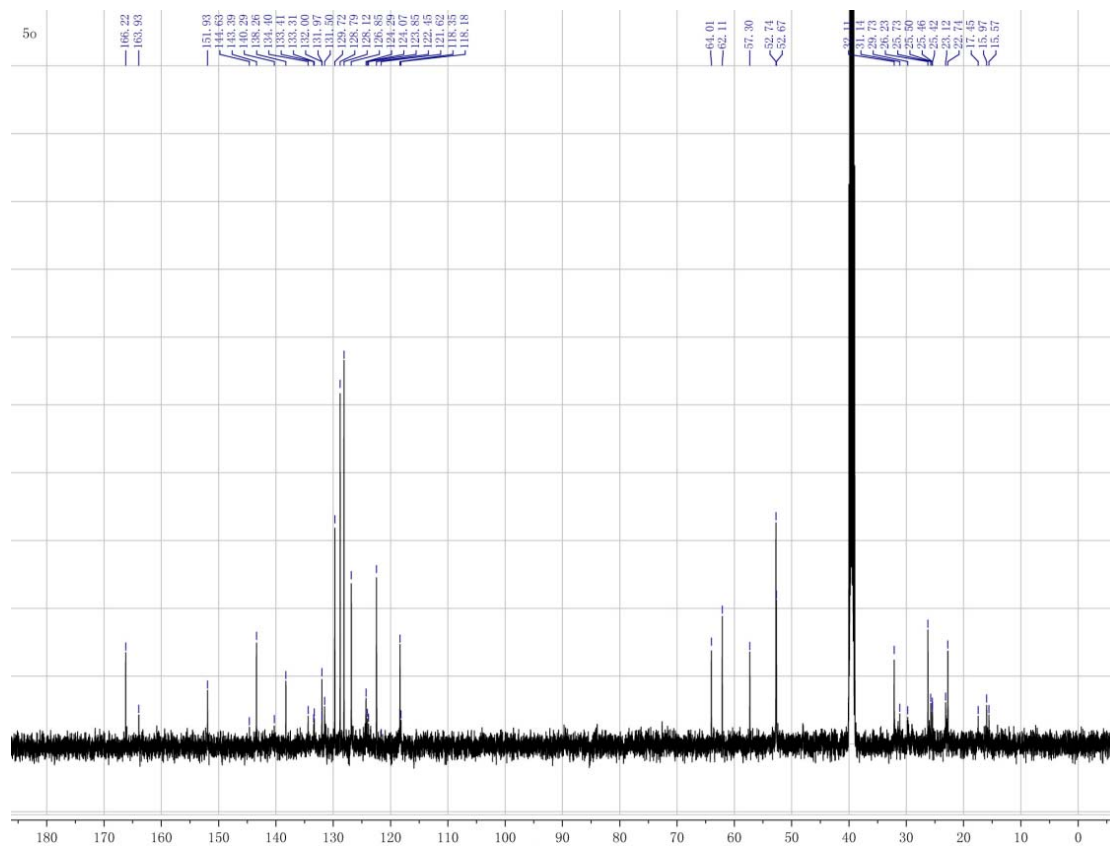

Fig. 38. The  $^{13}\text{C}$  NMR spectra for **5o**

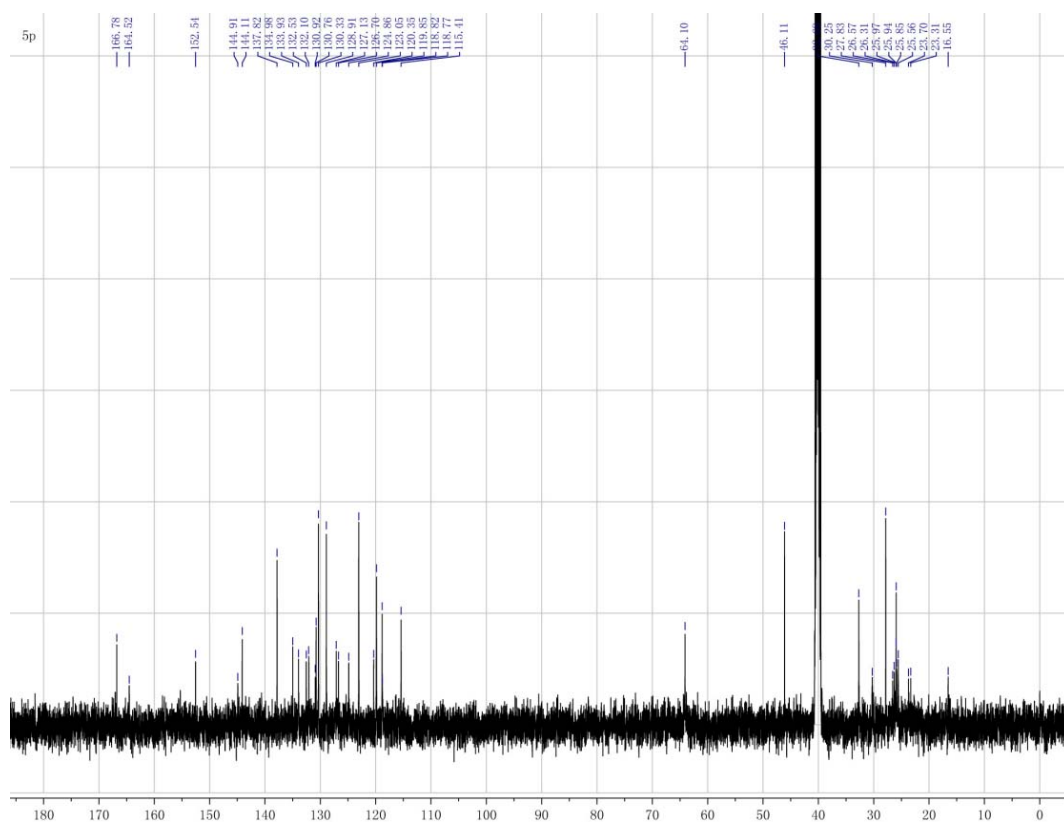

Fig. 39. The  $^{13}\text{C}$  NMR spectra for **5p**

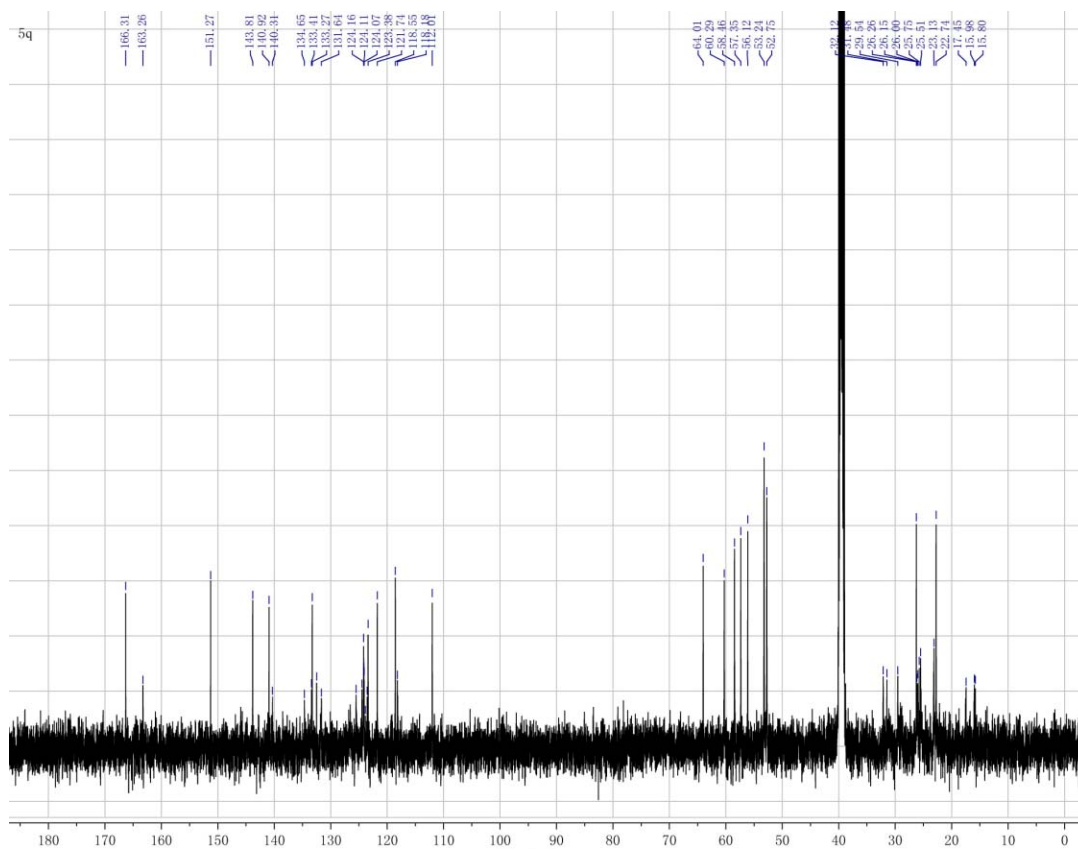

Fig. 40. The  $^{13}\text{C}$  NMR spectra for 5q

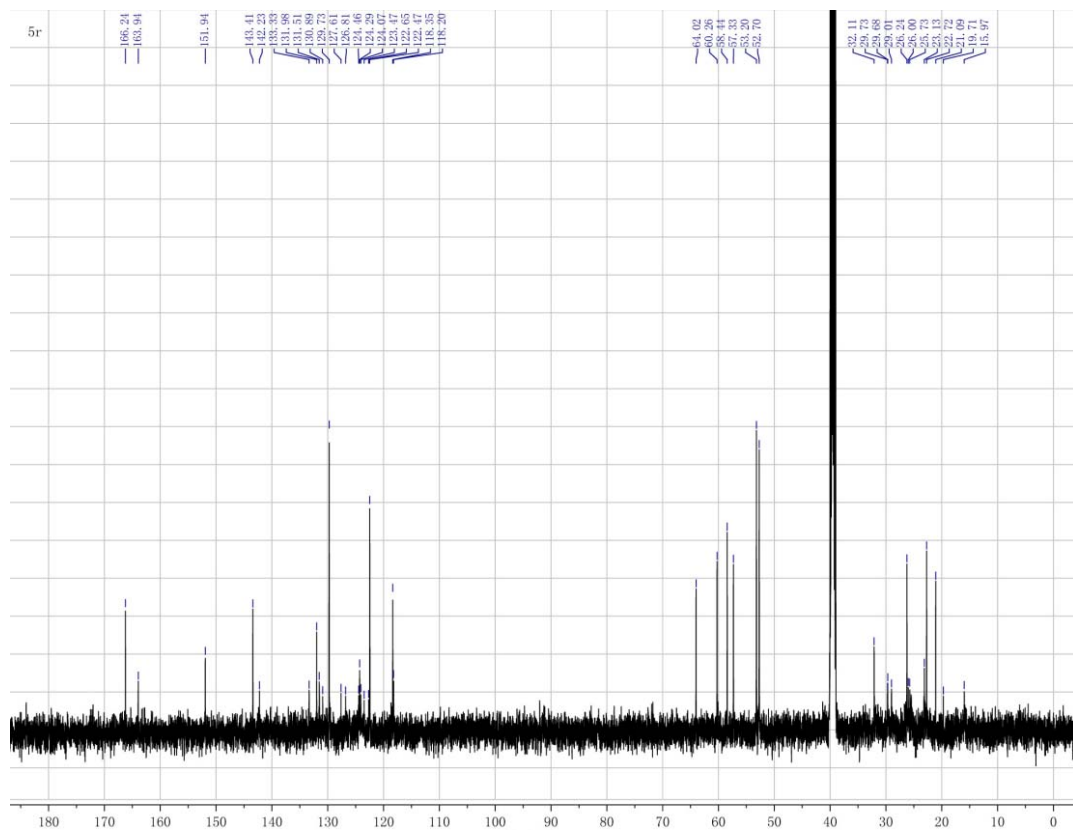

Fig. 41. The  $^{13}\text{C}$  NMR spectra for 5r

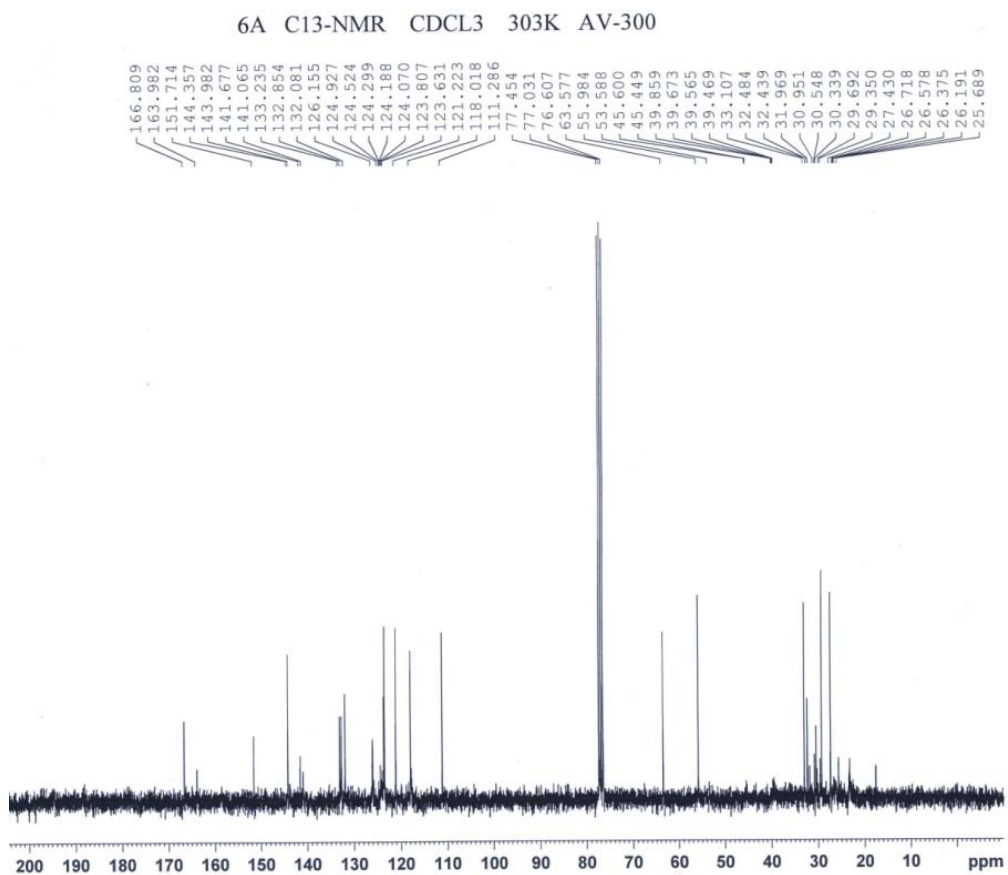

Fig. 42. The  $^{13}\text{C}$  NMR spectra for **6a**

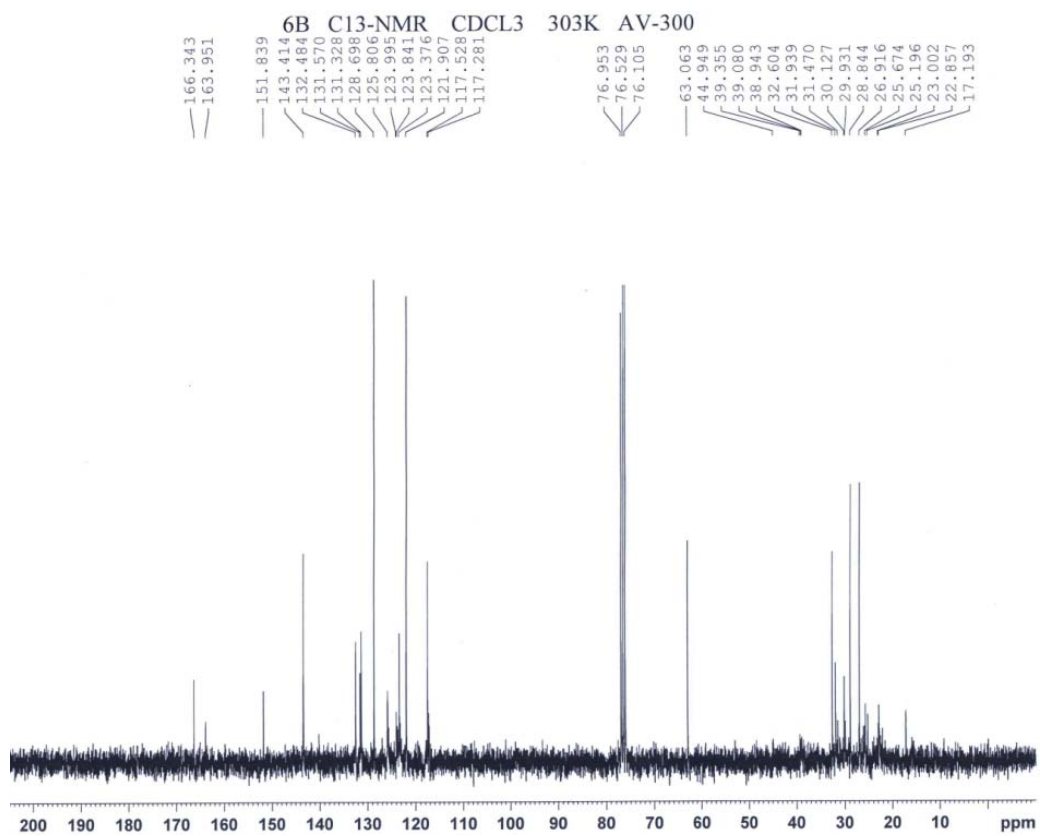

Fig. 43. The  $^{13}\text{C}$  NMR spectra for **6b**

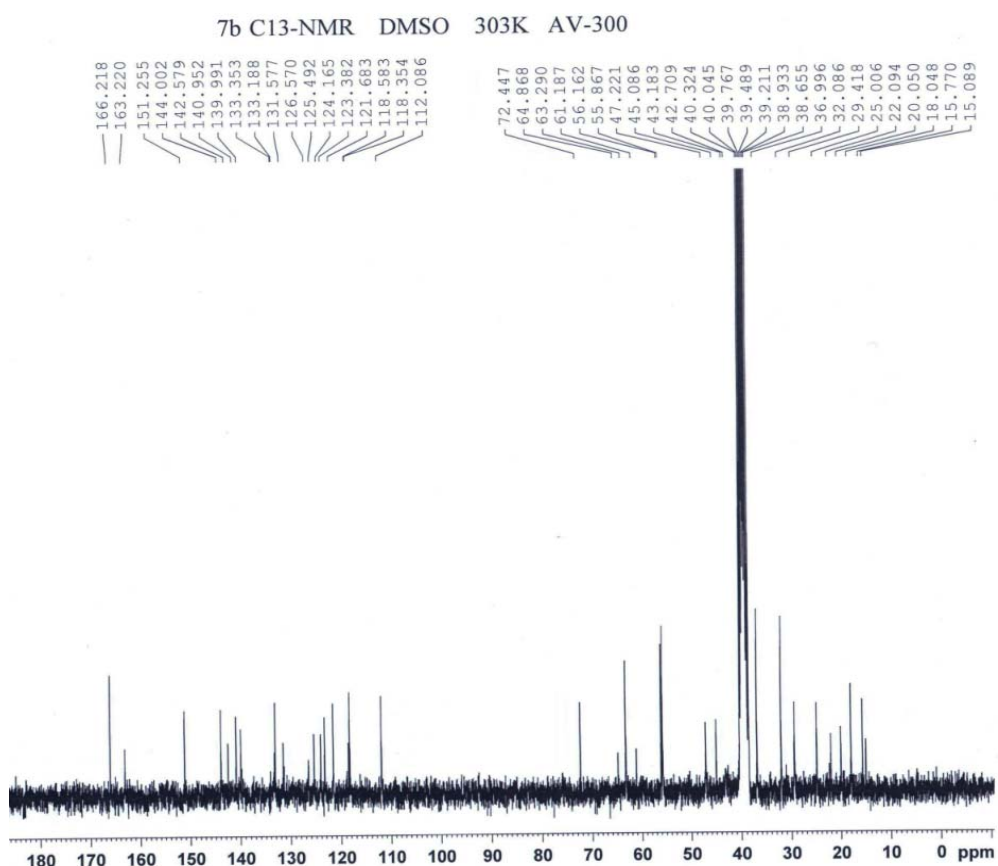

Fig. 44. The  $^{13}\text{C}$  NMR spectra for 7b

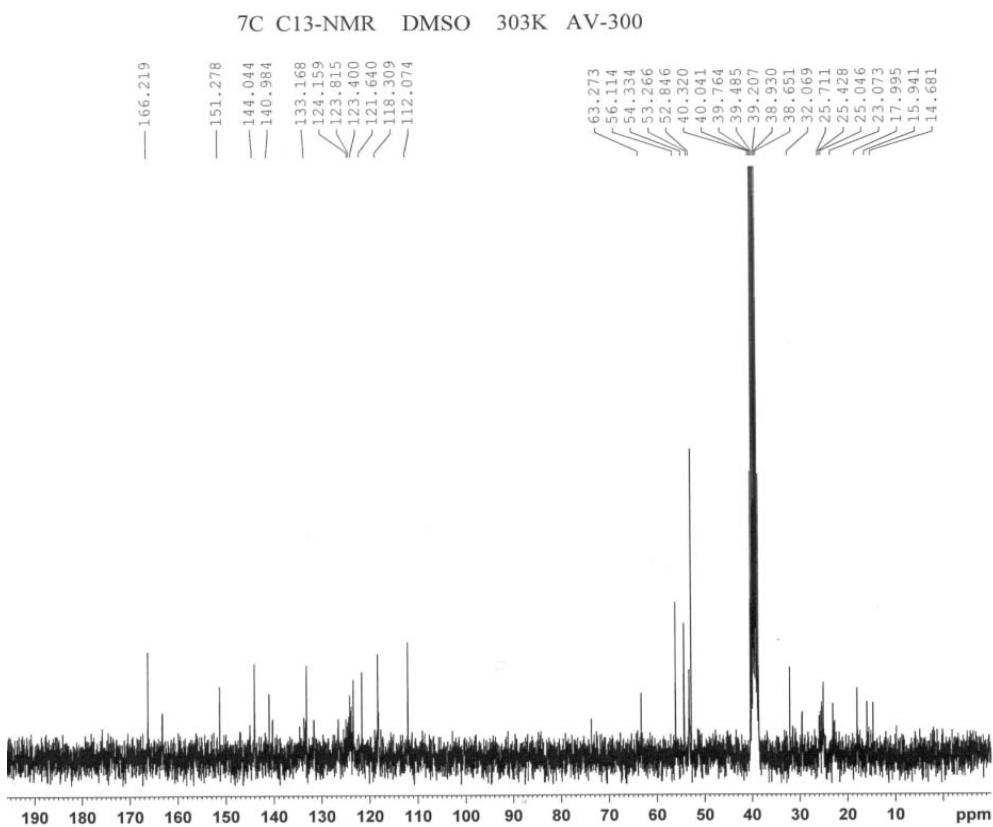

Fig. 45. The  $^{13}\text{C}$  NMR spectra for 7c



The HRMS spectra for **5a-5r**

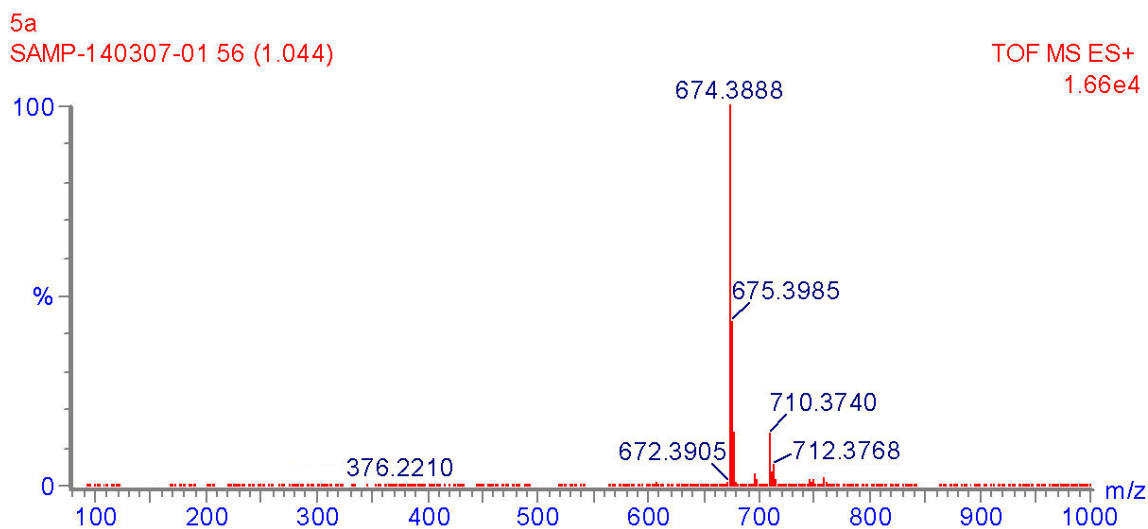

Fig. 46 HRMS spectrum of **5a**

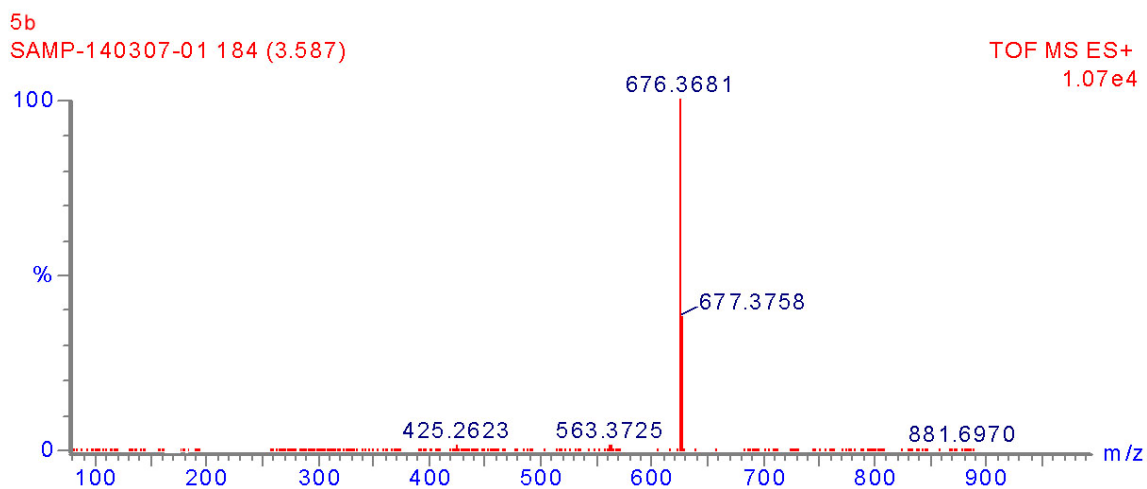

Fig. 47 HRMS spectrum of **5b**

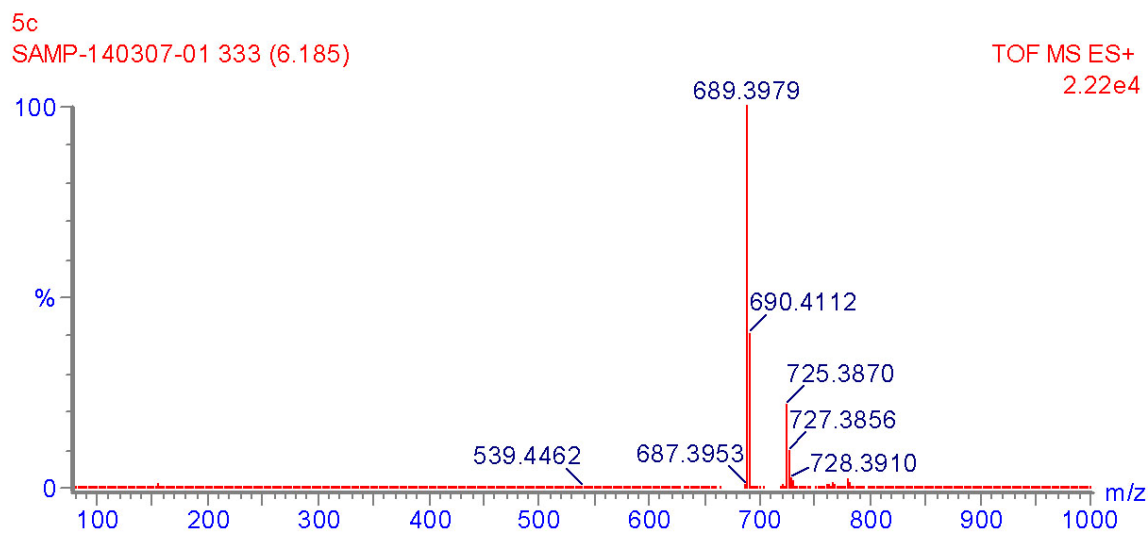

Fig. 48 HRMS spectrum of **5c**

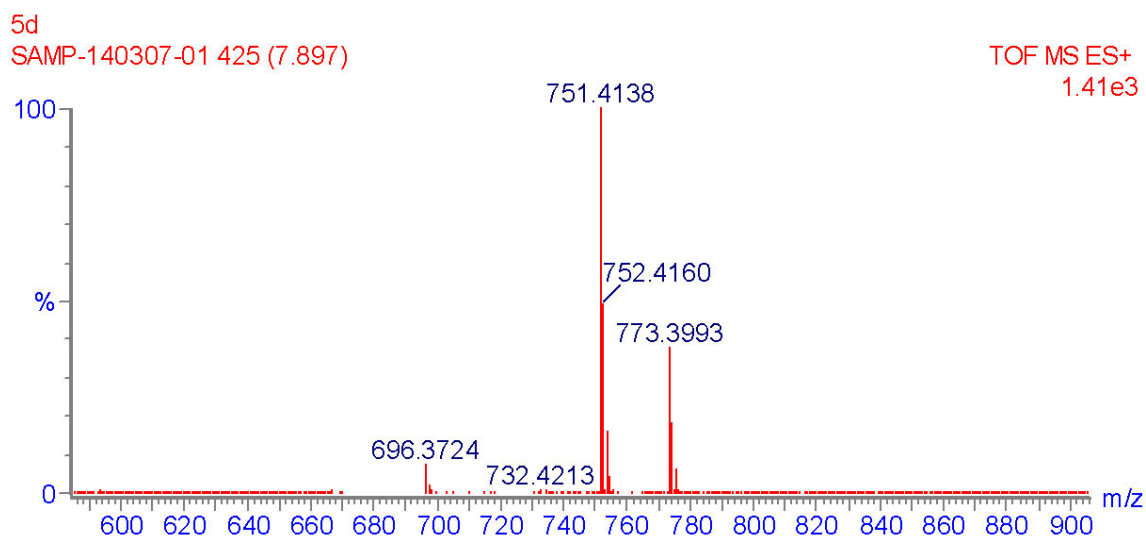

Fig. 49 HRMS spectrum of **5d**

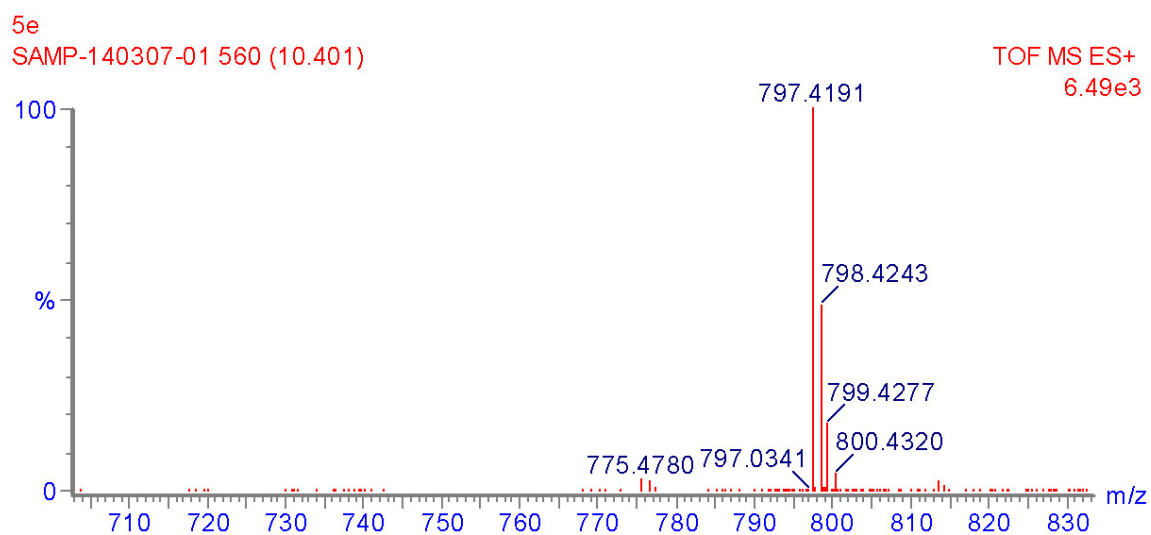

Fig. 50 HRMS spectrum of **5e**

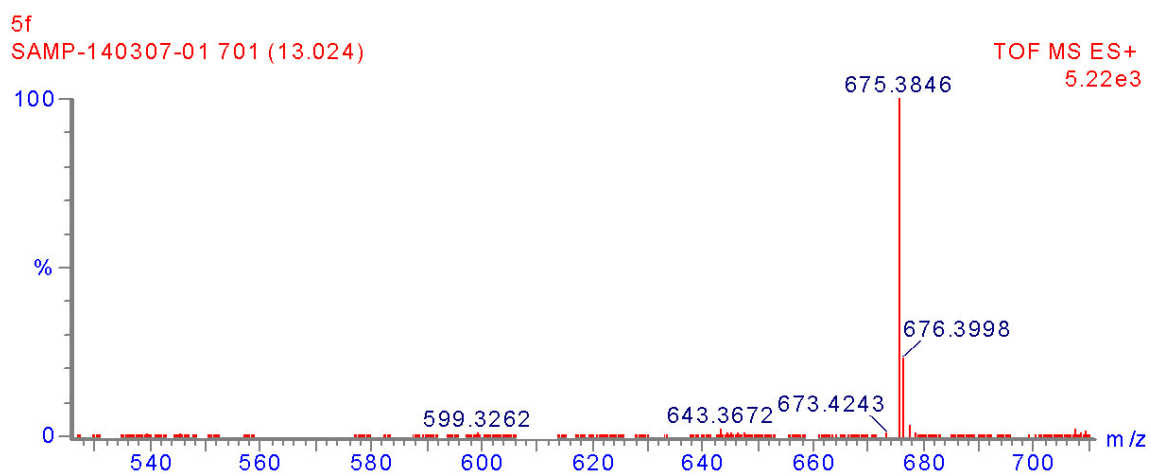

Fig. 51 HRMS spectrum of **5f**

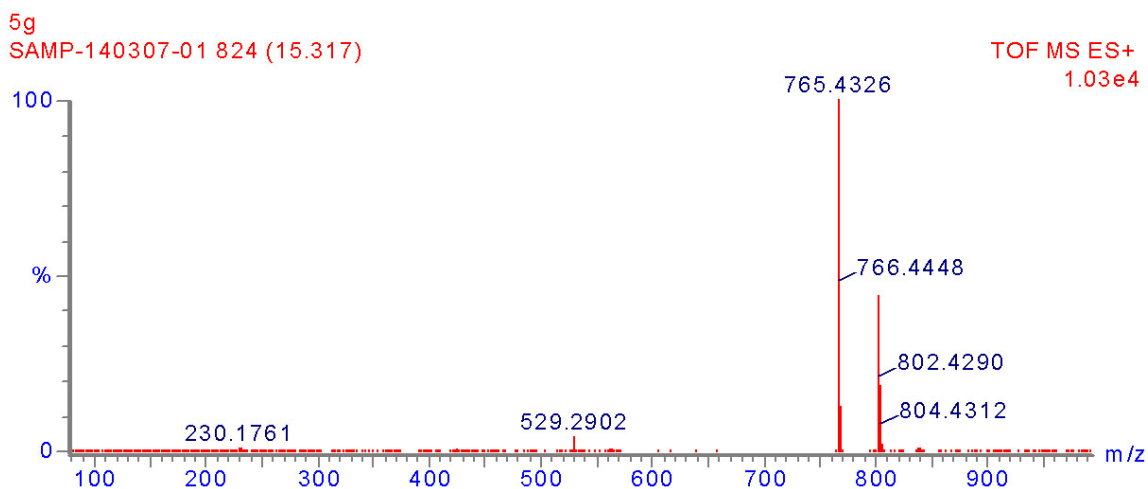

Fig. 52 HRMS spectrum of **5g**

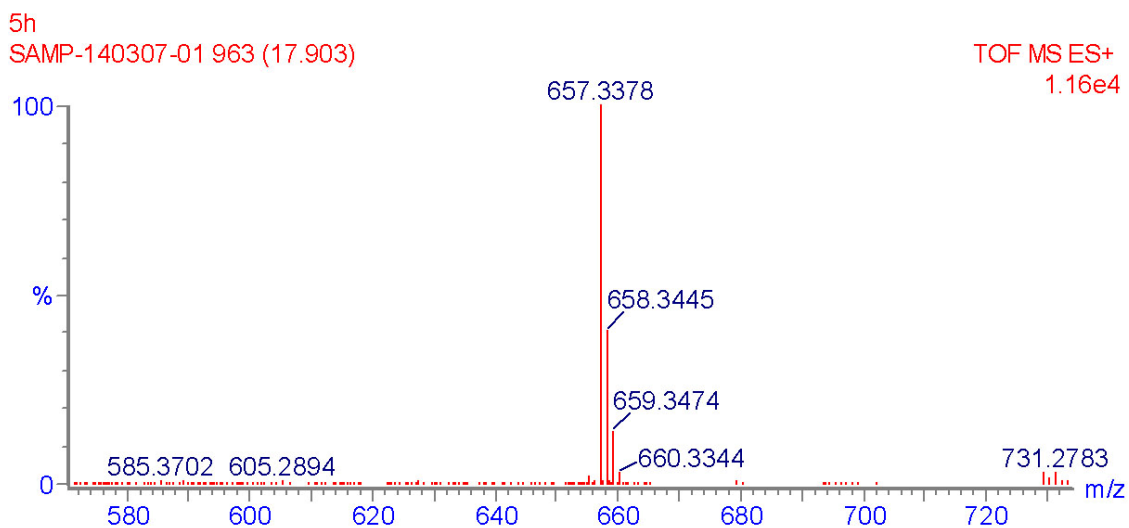

Fig. 53 HRMS spectrum of **5h**

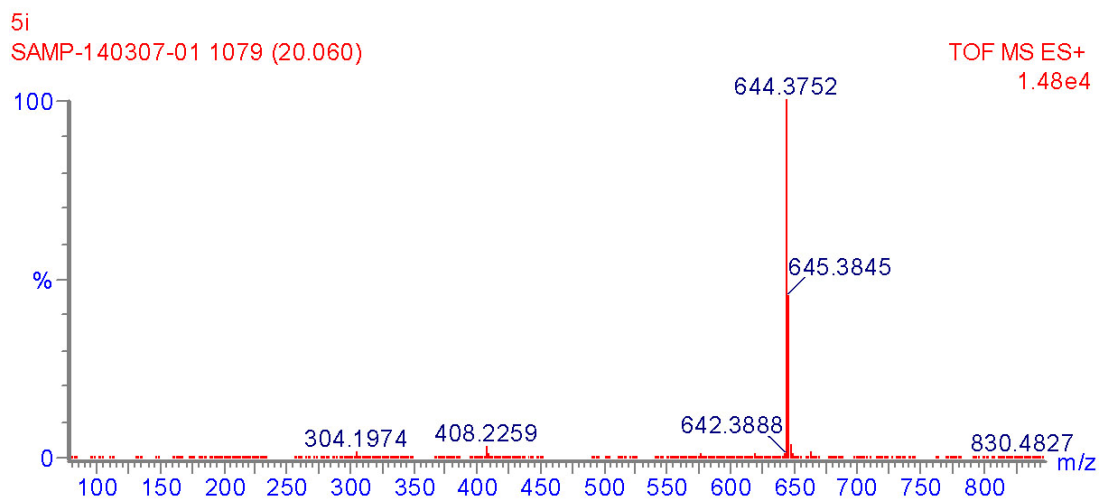

Fig. 54 HRMS spectrum of **5i**

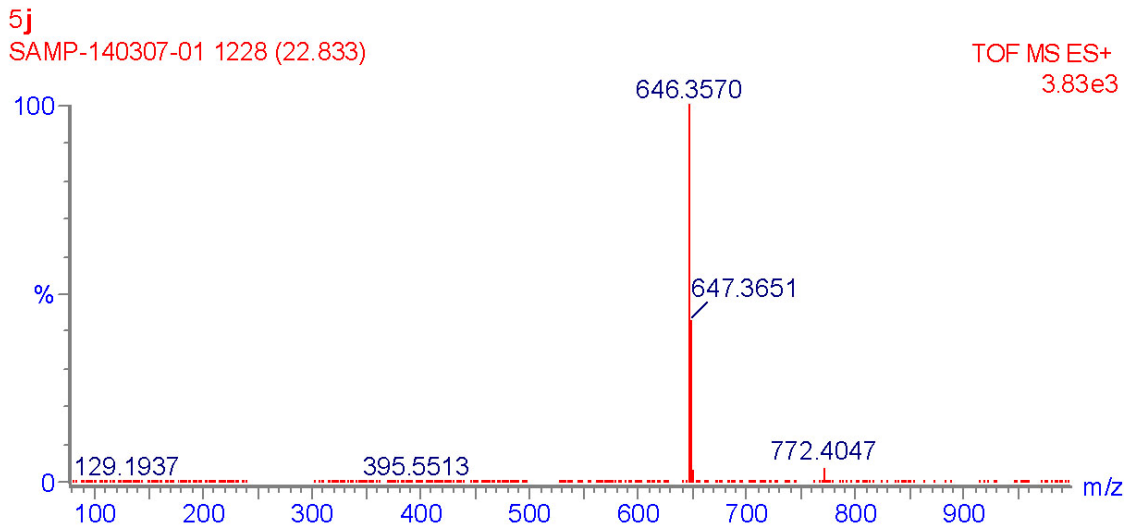

Fig. 55 HRMS spectrum of 5j

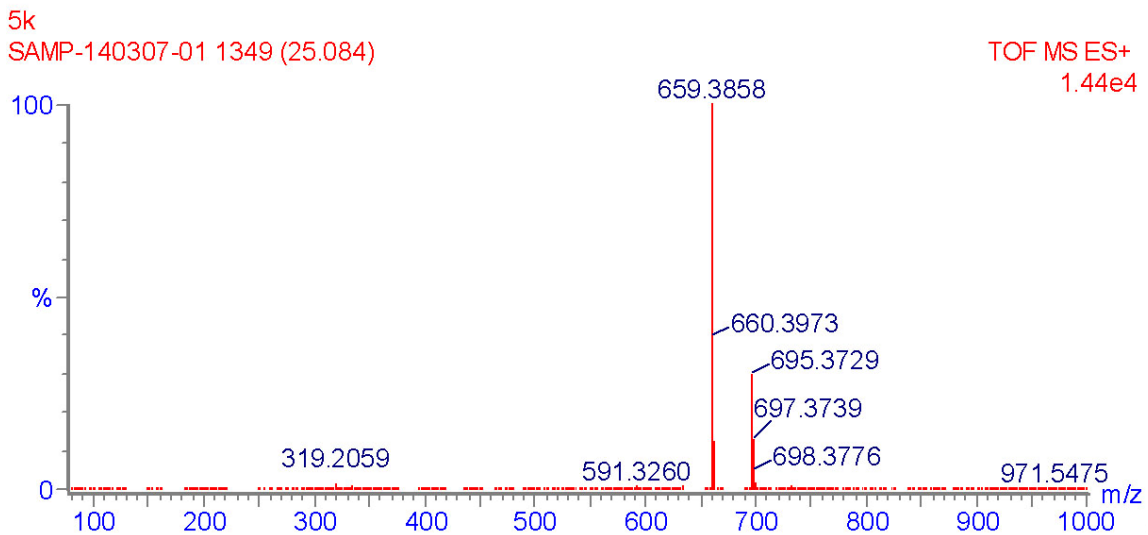

Fig. 56 HRMS spectrum of 5k

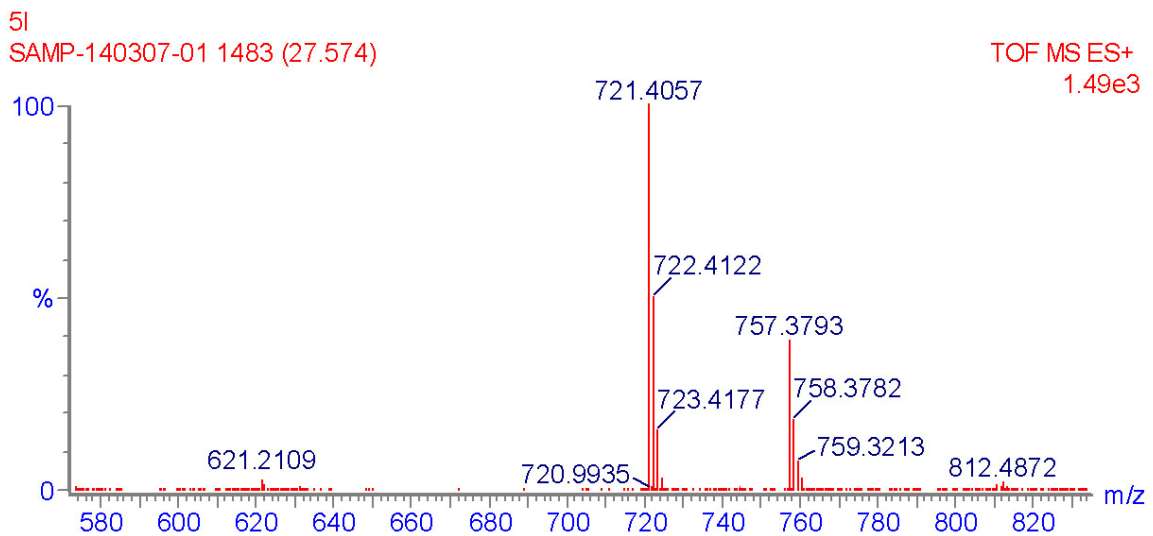

Fig. 57 HRMS spectrum of 5l

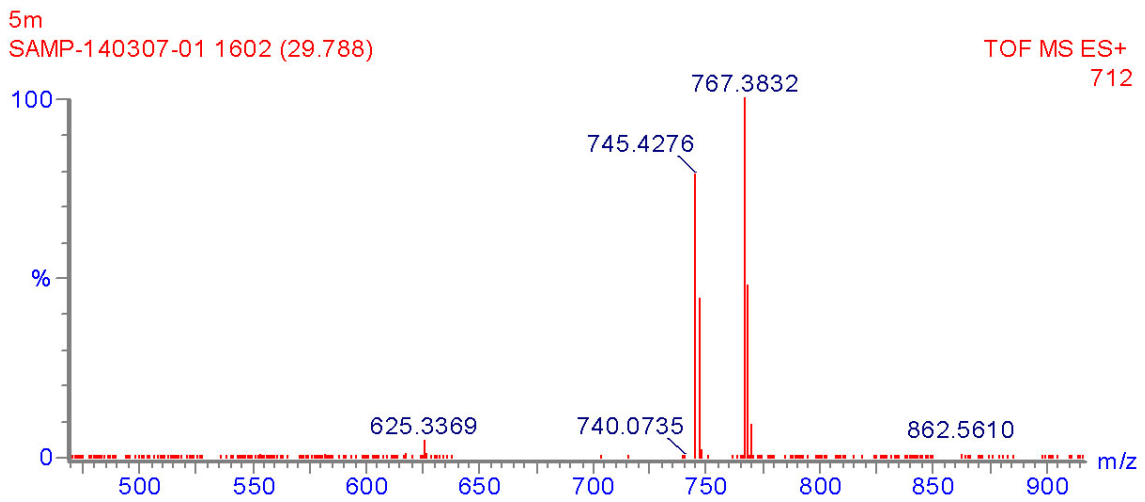

Fig. 58 HRMS spectrum of **5m**

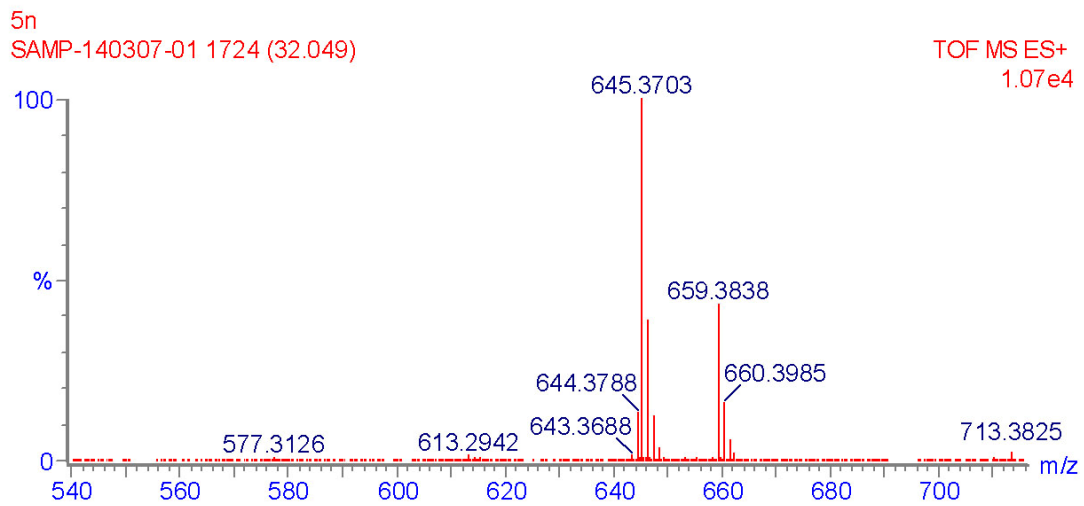

Fig. 59 HRMS spectrum of **5n**

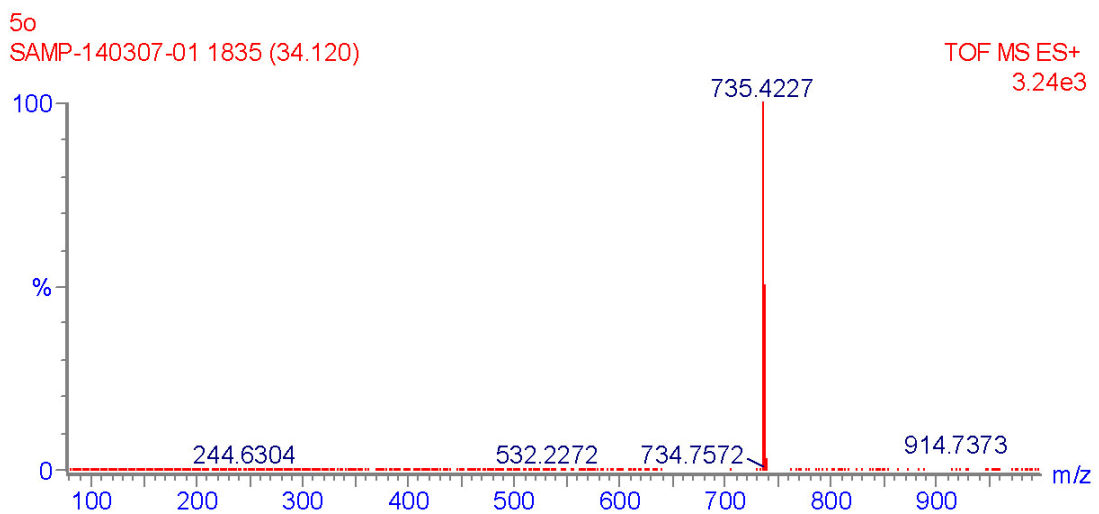

Fig. 60 HRMS spectrum of **5o**

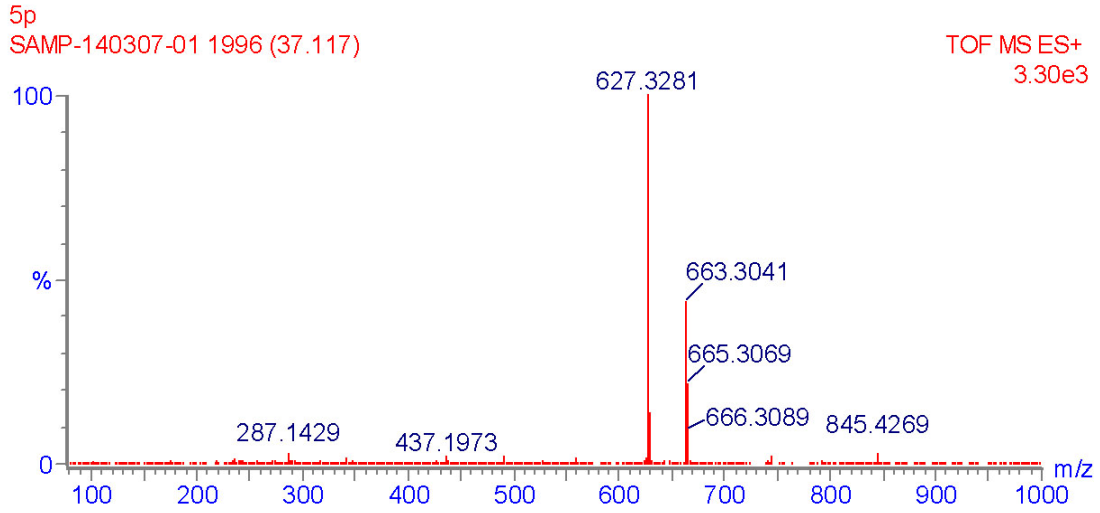

Fig. 61 HRMS spectrum of **5p**

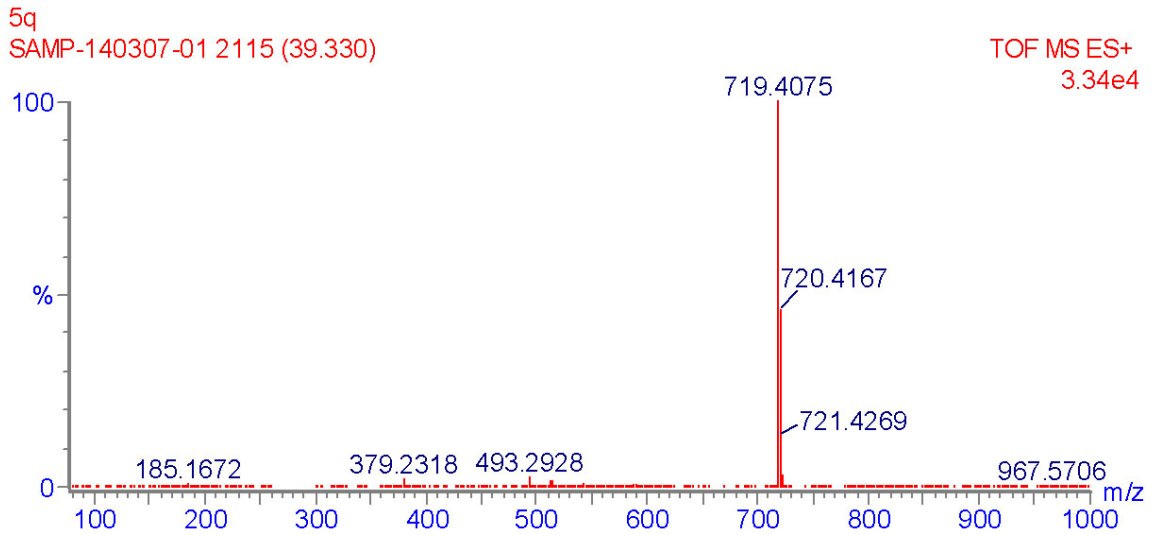

Fig. 62 HRMS spectrum of **5q**

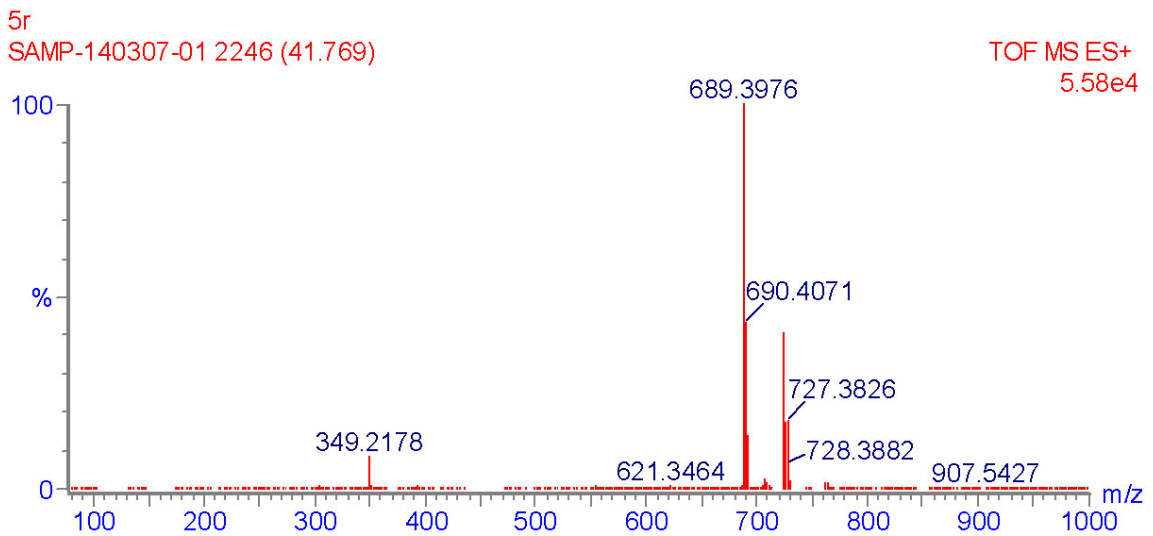

Fig. 63 HRMS spectrum of **5r**

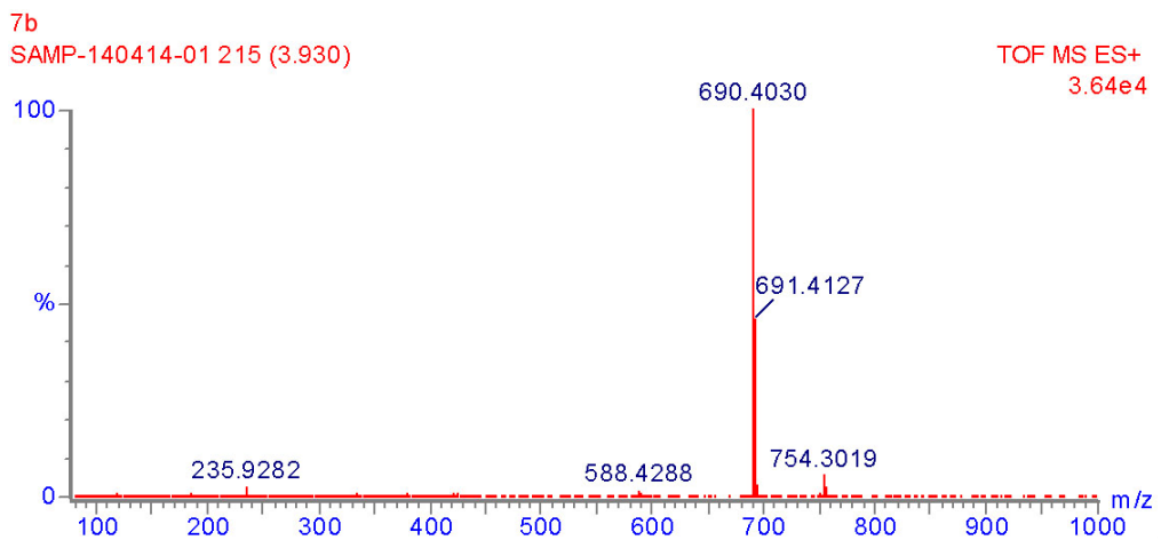

Fig. 64 HRMS spectrum of 7b

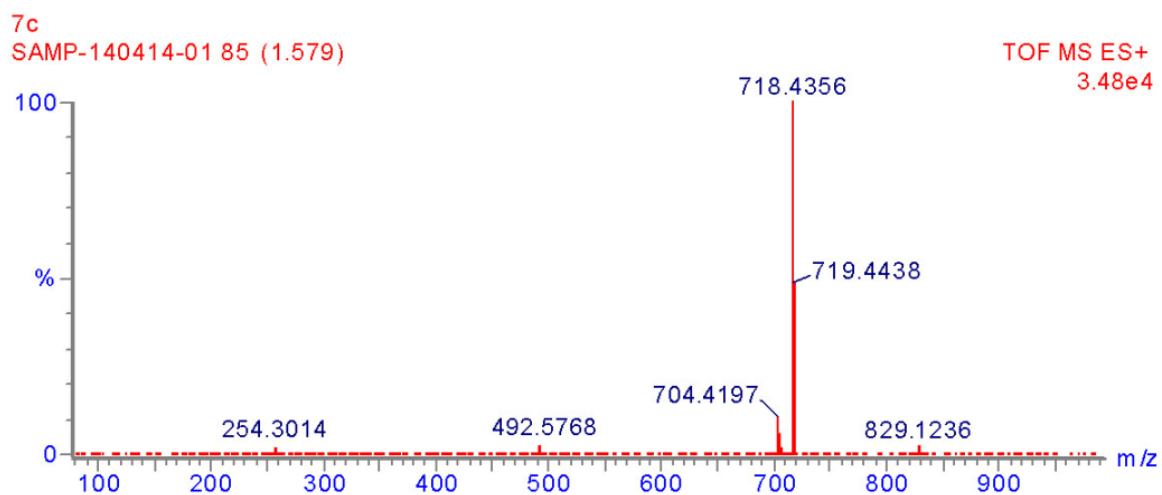

Fig. 65 HRMS spectrum of 7c
